1  
2  
3  
4  
5  
6  
7  
8  
9  
10  
11  
12  
13  
14  
15  
16  
17  
18  
19  
20  
21  
22  
23

# **Hexokinase: A central player in the synergism of high-intensity intermittent exercise and every-other-day intermittent fasting regimen on energy metabolism adaptations**

Antonio Real-Hohn<sup>1¶\*</sup>, Clarice Navegantes<sup>2¶</sup>, Katia Ramos<sup>2</sup>, Dionisio Ramos-Filho<sup>3</sup>, Fábio Cahuê<sup>2</sup>, Antonio Galina<sup>3</sup>, Verônica P. Salerno<sup>2,\*</sup>

<sup>1</sup> Max F. Perutz Laboratories, Medical University of Vienna, Vienna, A-1030; Austria.  
<sup>2</sup> Laboratory of Exercise Biochemistry and Molecular Motors, Bioscience Department, School of Physical Education and Sports, Federal University of Rio de Janeiro, Rio de Janeiro, 21.940-599; Brazil.  
<sup>3</sup> Laboratory of Bioenergetics and Mitochondrial Physiology, Institute of Medical Biochemistry Leopoldo de Meis, Federal University of Rio de Janeiro, Rio de Janeiro, 21.941-902; Brazil.

\* Corresponding authors  
E-mail: [vpsalerno@yahoo.com.br](mailto:vpsalerno@yahoo.com.br); [antonio.hohn@univie.ac.at](mailto:antonio.hohn@univie.ac.at)

¶ These authors contributed equally to this work.

## 1 **Abstract**

2           Visceral lipid accumulation, organ hypertrophy and a reduction in skeletal muscle  
3 strength are all signs associated with the severity of obesity related disease. Intermittent  
4 fasting (IF) and high-intensity intermittent exercise (HIIE) are natural strategies that,  
5 individually, can prevent and ameliorate obesity along with metabolic syndrome and its  
6 associated diseases. However, the combinatorial effect of IF and HIIE on energetic  
7 metabolism is currently not well understood. We hypothesized that their combination  
8 could have a potential for more than strictly additive benefits. Here, we show that two  
9 months of every-other-day intermittent fasting regimen combined with a high-intensity  
10 intermittent exercise protocol (IF/HIIE) produce a synergetic effect, preventing fat  
11 accumulation, enhancing physical performance and optimizing energy production. The  
12 IF/HIIE group presented increased glucose uptake, lower levels of serum insulin and a  
13 global activation of hexokinases in skeletal muscle, heart and liver comparing to control,  
14 IF and HIIE groups. IF/HIIE synergism led to activation of the FoF1 ATP synthase and  
15 promoted a more oxidative profile of mitochondria in observed skeletal muscle.  
16 Additionally, high-resolution respirometry of muscle fibers showed that animals in the  
17 IF/HIIE group presented characteristics suggestive of augmented mitochondrial mass  
18 and efficiency. Finally, an important reduction in serum oxidative stress markers were  
19 observed in IF/HIIE group. These findings provide new insights for the implementation  
20 of non-pharmaceutical strategies to prevent/treat metabolic syndrome and associated  
21 diseases.

22

# 1 Introduction

2 Obesity and metabolic syndrome are both important risk factors for life threatening  
3 diseases that can target cardiovascular and hepatic systems (1, 2). The prevalence of obesity  
4 and metabolic syndrome is a reality for developed countries, which began more than two  
5 decades ago (3). Today, the incidence of obesity and metabolic syndrome is rapidly  
6 increasing in developing countries as well (4), leading to increased morbidity and mortality  
7 due to type 2 diabetes mellitus, non-alcoholic fatty liver disease, and cardiovascular disease  
8 (5, 6). Recently, global climate change was implicated in the onset of obesity and type 2  
9 diabetes due to the negative impact of higher temperatures on energy metabolism (7, 8).  
10 This means that the overall prevalence of obesity and metabolic syndrome tends to  
11 aggravate in the next few years allied with the increased reduction in physical activity (9).

12 Intermittent fasting (IF) regimens and high-intensity intermittent exercise (HIIE) are  
13 two natural strategies to prevent and mitigate obesity related diseases (10, 11). An every-  
14 other-day IF regimen was recently demonstrated by Li, Xie (12) to dramatically reduce  
15 obesity, insulin resistance, and hepatic steatosis in rodents by altering the gut microbiota.  
16 Conversely, the adaptations promoted by HIIE in rodents has been demonstrated to be a  
17 direct, stimulus-driven mechanism with a global effect through the mobilization of several  
18 organs like skeletal muscles (13), liver (14) and heart (15). Both IF and HIIE approaches  
19 are appropriate treatments for obesity-related problems in humans (16, 17). Noteworthy, IF  
20 and HIIE strategies respectively resemble the evolution patterns of human diet (18), with  
21 an erratic food availability, and the high-intensity intermittent exercise analogous to  
22 hunting/gathering activities (19).

23 Recently, a study combining caloric restriction with HIIE revealed increased glucose uptake  
24 along with higher Glut4 and Fasn mRNA levels in skeletal muscle (20). Ever since IF can  
25 produce different adaptations compared to caloric restriction (21), we reasoned that IF  
26 associated with HIIE could have a strong synergic effect in energy metabolism through  
27 hexokinase modulation and mitochondrial reprogramming. We centered our assessment on

1 hexokinase, as this enzyme is known to be essential to overcome the rate-limiting step of  
2 the glucose metabolism (22) and the rate-limiting step of the oxidative phosphorylation  
3 (23).

## 4 **Material and methods**

### 5 **Animals and intermittent fasting protocol**

6 All animal procedures performed received prior approval from the Animal Use  
7 Ethical Committee in the Health Science Center of the Federal University of Rio de  
8 Janeiro (Rio de Janeiro, RJ, Brazil; Protocol CEUA/EEFD06). At the beginning of the  
9 adaptation phase (one month), twenty-four, 60-day-old male Wistar rats were housed in  
10 a climate-controlled environment ( $22.8 \pm 2.0$  °C, 45–50% humidity) with a 12/12–  
11 light/dark cycle with access to food and water ad libitum. Three weeks before the  
12 beginning of the study, animals were acclimated to the experimental protocols: Two  
13 weeks under the IF regimen followed by one week with the IF regimen plus HIIE (no  
14 overload). The chow given to the animals was a standard laboratory chow Nuvilab CR-  
15 1 (Nuvital Nutrientes, Paraná, Brazil) with 22% protein, 8% fibers, and 4% fat. Animals  
16 in control (C) and HIIE groups had access to food ad libitum during all the study while  
17 those in IF and IF/HIIE groups were subjected to an every-other-day IF regimen. IF and  
18 IF/HIIE groups were provided access to food ad libitum for 24 hours that was alternated  
19 with 24 hours without food. Animals were weighed weekly in the morning before the  
20 withdrawal or reintroduction of food. Food consumption was evaluated daily and the  
21 intermittent fasting resulted in a 15% reduction in total offered calories. Importantly, at  
22 the beginning of the study, animals already had reached 90-day-old (young adults),  
23 avoiding influences of sexual maturation (30-40 days) (24) and musculoskeletal  
24 development (25) in our analyzes.

## 1 **High intensity intermittent exercise protocol and physical test**

2           Groups HIIE and IF/HIIE performed 8 weeks of an interval swimming exercise  
3 consisting of 14 repeated 20-second swimming bouts with weight (equivalent to percent  
4 body weight) attached with 10 seconds rest between the repeats as described previously  
5 (26). Before the beginning of the study, animals were adapted one week to the aquatic  
6 conditions by performing the exercise without an overload. An initial overload of 6% of  
7 the body weight (bw) was attached to the animal during the swimming period. The load  
8 was increased by 2% bw every two weeks. The HIIE protocol was performed exclusively  
9 at Mondays, Wednesdays and Fridays during the protocol adaptation and continued  
10 during the 8 weeks of the study. This routine was employed to avoid overtraining the  
11 animals. Physical tests were used to determine changes in cardiorespiratory endurance in  
12 the animals. Each test consists of the time swimming until fatigue under a 12% bw  
13 overload, that was applied on three separate occasions: (1st) one day before day 0, (2nd)  
14 at day 28, and (3rd) at day 56 (Fig 1 and 5A).

## 15 **Intraperitoneal glucose tolerance tests**

16           Animals were fasted for 12 hrs prior to the administration of an intraperitoneal  
17 injection of glucose (2 g/kg body weight). Blood samples were drawn from tail vein  
18 immediately before the glucose challenge, as well as 15, 30, 60, 90, and 120 min  
19 thereafter. Blood glucose levels were determined using an Accu-Chek glucose analyzer  
20 (F. Hoffmann-La Roche Ltd, Basel, Switzerland).

## 21 **Fasting serum insulin evaluation**

22           Blood samples were collected in fasted animals with heparinized tubes and the  
23 serum were separated by centrifugation and kept in -80 °C. The total insulin level of the  
24 frozen serum samples was measured using an Elisa-based method by VetLab Veterinary  
25 Clinical Pathology Laboratory (Petropolis, Rio de Janeiro, Brazil).

## 1 **Tissue collection and preparation**

2 Heart, liver, gastrocnemius muscle and visceral fat were rapidly removed from  
3 animals euthanized by decapitation 2 days after the last day of the experimental period  
4 (56 days) and weighed. For enzymatic analysis and NADH measurements, tissue was  
5 homogenized with a Potter-Elvehjem in homogenization buffer (30 mM KCl, 4 mM  
6 EDTA, 250 mM sucrose, and 100 mM Tris-HCl (pH 7.5) with the protease inhibitors  
7 aprotinin and PMSF). Homogenates were centrifuged (5000 x g for 10 min at 4 °C) to  
8 obtain the supernatants that were maintained at 4° C. For the respiration analyses,  
9 gastrocnemius muscle was minced and transferred to ice-cold BIOPS buffer (10 mM  
10 Ca<sup>2+</sup>/EGTA, 0.1 mM free Ca<sup>2+</sup>, 20 mM imidazole (pH 7.1), 50 mM K<sup>+</sup>-MES, 0.5 mM  
11 DTT, 6.56 mM MgCl<sub>2</sub>, 5.77 mM ATP, 15 mM phosphocreatine). Next, saponin (50  
12 µg/ml) was added and incubated for 30 min at 4 °C, followed by a buffer exchange into  
13 ice-cold BIOPS without saponin. Samples were further incubated 2h at 4 °C prior to high-  
14 resolution respirometry experiments.

## 15 **Determination of fiber cross-sectional area**

16 Frozen gastrocnemius histological sections (5µm) were obtained in Leica CM  
17 1850 Cryostat (Leica Biosystems, Nussloch, Germany), fixed with 4% formal calcium  
18 and stained with the hematoxylin and eosin (HE) method. We captured images of the  
19 stained sections with Leica DM 2500 optical microscope (20 x lens) (Leica Biosystems,  
20 Nussloch, Germany). Fifty gastrocnemius myofibers from each animal of different  
21 groups were randomly selected and fiber cross-sectional area was measured using Image  
22 J 1.51n software (NIH, Bethesda, MD, USA). A total of 150 myofibers were plotted for  
23 each group to provide a reasonably reliable estimate of the total fiber number (27).

## 1 **Hexokinase activity**

2 The method to measure enzymatic activity was performed at 37 °C in buffer  
3 containing 4 mM MgCl<sub>2</sub>, 50 mM Tris-HCl (pH 7.5), 20 mM glucose (0.1 mM glucose  
4 for liver), 4 mM ATP, 1 U/ml G-6PDH, 0.5 mM β-NADP<sup>+</sup>, and 0.1% Triton X-100 with  
5 a protein concentration of 0.05 mg/ml. The absorbance at 340nm was acquired every 30  
6 seconds for 30 minutes and the enzymatic activity was calculated using a molar  
7 extinction coefficient of 0.00622 uM<sup>-1</sup> cm<sup>-1</sup> for NADPH.

## 8 **Oxidative profile measurements**

9 The oxidative profile of skeletal muscle was determined through the measurement  
10 of its mitochondrial NADH content through a fluorescence assay. Briefly, 140 μg of  
11 protein from a muscle sample homogenate derived from each animal was placed into a  
12 98 well plate and excited at 340 nm. The emission at 450nm was measured in a  
13 Spectramax Paradigm (Molecular Device, Sunnyvale, CA, USA). The assay was  
14 repeated three times and the fluorescence values were plotted as arbitrary numbers.

## 15 **High resolution respirometry**

16 Respiration measurements were performed on fiber bundles in 2 ml of  
17 mitochondrial respiration medium 05 (110 mM sucrose, 60 mM potassium lactobionate,  
18 0.5 mM EGTA, 3 mM MgCl<sub>2</sub>, 20 mM taurine, 10 mM KH<sub>2</sub>PO<sub>4</sub>, 20 mM HEPES (pH  
19 7.1), 2 mg/ml BSA). O<sub>2</sub> consumption was measured using the high-resolution Oxygraph-  
20 2k system (Oroboros Instruments GmbH, Innsbruck, Austria). The results were  
21 normalized to the wet weight of the permeabilized fiber bundles. All the experiments  
22 were performed at 37 °C in a 2 ml chamber. Mitochondria membrane permeability was  
23 tested by the addition of 10 μM cytochrome c. No greater than a 10% increase in oxygen  
24 consumption was observed. Multi-substrate titrations, respiratory states and respiratory  
25 control ratio calculations were performed. State 3 was measured after addition of

1 complex I substrate, complex II substrate, and ADP. State 4o was measured subsequently  
2 to State 3 after addition of oligomycin to mimic State 4. State uncoupled was measured  
3 in the sequence through addition of FCCP. RCR was calculated by State 3 divided by  
4 State 4o (28).

## 5 **FoF1 ATP synthase activity assay in skeletal muscle**

6 ATP synthase activity was extrapolated from ATP hydrolysis (ATPase) activity  
7 (29). Briefly, 50  $\mu$ g of protein from gastrocnemius homogenate from each animal was  
8 used to measure ATPase activity in 1 mM ATP, 5 mM  $MgCl_2$ , and 50 mM Tris (pH 8,5)  
9 buffer with the presence or absence of 5 mM sodium azide at 37 °C. After TCA  
10 precipitation (20% w/v) and centrifugation (3000 x g for 15 minutes at 4 °C) the resultant  
11 supernatant was collected and combined with ammonium molybdate and Fiske-  
12 Subbarow reducer. The absorbance was measured at 660 nm.

## 13 **Protein oxidation**

14 Protein oxidation levels were measured using the protein carbonyl content method  
15 (PCC), as previously described (30). Briefly, the blank sample was mixed with 2.5 N  
16 HCl and the other with 2,4-dinitrophenylhydrazine (freshly prepared in 2.5 N HCl) and  
17 the resulting solutions were incubated in dark for 1 h at RT with intermittent vortexing  
18 (every 15 min), with subsequent addition of 10% TCA (w/v). After centrifugation, the  
19 pellet was washed once with 10% TCA and three times with ethanol: ethyl acetate (1:1  
20 v/v). The resulting pellets were suspended in 5 M urea (pH 2.3), incubated at 37 °C for  
21 15 minutes and centrifuged at 15000 x g for 5 minutes. The resulting supernatant  
22 absorbance was determined at 370 nm, and results were expressed as nmol carbonyl / mg  
23 protein.



## 1 **Lipid peroxidation**

2 Lipid peroxidation levels were measured using thiobarbituric acid method  
3 (TBARS), with minor modifications of the technique previously described (31). Serum  
4 samples were diluted in 100 mM sodium phosphate buffer (pH 7.4), 1:3 (v/v), with  
5 subsequent addition of cold 10% TCA and kept on ice for 15 minutes. After, samples  
6 were centrifuged at 2200 x g for 15 min (4 °C) and to the resultant supernatants were  
7 added equal volumes of 0.67% thiobarbituric acid (w/v) followed by water bath (95 °C)  
8 incubation for 2 h. After cooling, the absorbances were read at 532 nm in 96-well plate  
9 reader, Spectra Max Paradigm (Molecular Devices, California, United States). Results  
10 were expressed in  $\mu\text{M}$  malondialdehyde (MDA).

## 11 **Statistical analysis**

12 Comparisons were performed using two-way ANOVA with multiple comparison  
13 test. Data are presented as mean  $\pm$  standard deviation (SD) and P values  $< 0.05$  were  
14 considered significant. All statistical analyzes were performed using Prism 7.0 (Graph  
15 Software Inc., La Jolla, CA, USA).

## 16 **Results**

### 17 **IF/HIIE protocol prevented weight gain and increased muscle cross-** 18 **sectional area**

19 To determine the adaptive changes on energetic metabolism and physical  
20 performance induced by IF, HIIE, and their combination, the three regimens were imposed  
21 on age-matched young adult Wister rats over 8 weeks (Fig 1). Over the course of the  
22 experimental conditions, the weight of the animals was tracked weekly and plotted in a  
23 curve (Fig 2A). The cumulative increase in the weight of animals on an ad libitum diet (C  
24 and HIIE groups) is very apparent and the prevention of excessive weight gain in animals

1 under IF protocol (IF and IF/HIIE groups) is evident; other groups observed a similar effect  
2 (12, 18). To explore the possible origin of the observed differences in the weight of the  
3 groups, organs and tissues were collected and weighed at the end of the study. Initially, we  
4 weighed the brown adipose tissue (Fig 2B) and the visceral fat (Fig 2C) of the animals. Our  
5 results were similar to those observed in Li et al., with no variation in brown adipose tissue  
6 mass and an evident reduction in visceral fat mass in groups under IF protocol (IF and  
7 IF/HIIE) (12). We also observed a reduced total mass of the liver (Fig 2D) and heart (Fig  
8 2E) in animals under the IF protocol (IF and IF/HIIE groups). A reduction in skeletal muscle  
9 (gastrocnemius) total mass (Fig 2F) was observed in the IF group and an evaluation of the  
10 cross-sectional area (CSA) confirmed the indications of atrophy (Figs 2F and 2G). In  
11 contrast, the measurement of CSA from the IF/HIIE group was indicative of hypertrophy  
12 of the myofibers followed to a lesser extent by the HIIE group (Figs 2F and 2G).

13 **Fig 1. Graphical representation of the experimental design.** Days (dots) and weeks  
14 (horizontal lines) of the study period (56 days in total) showing the exactly days of fasting  
15 (lower dash) and HIIE (upper dash) interventions. The load utilized for each HIIE is  
16 described above the respective days. The 1st, 2nd, and 3rd physical tests for endurance are  
17 indicated. The adaptation phase is represented by weeks with negative numbers.

18 **Fig 2. IF/HIIE prevented weight gain, adiposity and increases skeletal muscle cross-**  
19 **sectional area.** (A) The body weight curve from the weekly weight weekly obtained in the  
20 morning before the withdrawal or reintroduction of food. Tissues and organs were collected  
21 from animals 2 days after day 56, end of the study period, and immediately weighed. (B)  
22 Brown adipose tissue weight; (C) visceral fat weight; (D) liver weight (intact organ); (E)  
23 heart weight (intact organ); (F) skeletal muscle weight (gastrocnemius); (G) cross-sectional  
24 area histological profile (myofibers were stained with HE; 50  $\mu$ m bar) and (H)  
25 quantification (dot blot representation with average and standard deviation bars of 150  
26 myofibers per group).  $p < 0.05$ ; a vs. control, b vs. HIIE, and c vs. IF.

## 1 **Serum glucose uptake is integrated with hexokinase activity in IF/HIIE** 2 **group**

3 To investigate how IF and HIIE could impact the systemic glucose availability and  
4 metabolism, we measured the fasting blood glucose levels, rate of glucose uptake and  
5 fasting serum insulin levels (Fig 3). All groups presented similar values for fasting blood  
6 glucose (Fig 3A). Initially, the glucose tolerance test also showed similarities between  
7 groups (Fig 3B). However, an analysis of the area under the curve (AUC) revealed that the  
8 IF/HIIE group presented a significantly faster glucose uptake (Fig 3C). Glucose uptake  
9 allied to fasting serum insulin levels that could present a predictive factor of insulin  
10 sensitivity (32, 33). For this reason, we measured the fasting insulin level of the different  
11 groups (Fig 3D) and we observed an important reduction for the IF/HIIE group followed  
12 by the IF group.

13 **Fig 3. IF/HIIE activates glucose uptake and reduces fasting serum insulin levels.** (A)  
14 Serum blood glucose levels. (B) Glucose tolerance test. Animals were fasted for 12 h prior  
15 to the administration of an intraperitoneal injection of glucose (2 g/kg body weight). (C)  
16 AUC calculated from glucose tolerance test curve (B). (D) Insulin serum levels of fasted  
17 animals were measure using an Elisa-based method.  $p < 0.05$ ; a vs. control and b vs. HIIE.

18 According to the literature, sugar transport has been integrated with hexokinase (HK)  
19 activity in a cellular model (34). To test if this mechanism could explain observations in a  
20 more complex system, we hypothesized that increased blood glucose uptake could be  
21 integrated to an increased HK activity in multiple organs (Fig 4). In the liver, we observed  
22 that the IF/HIIE group had the highest HK activity followed by HIIE and IF groups, which  
23 showed similar activity values (Fig 4A). In heart, both IF and IF/HIIE groups showed  
24 increased HK activity (Fig 4B). In skeletal muscle, the IF/HIIE group had the highest HK  
25 activity (6-fold increase) followed by HIIE group (3-fold increase). Taken together, the HK

1 activity data from all analyzed organs suggest that IF/HIIE group possess the highest values  
2 for HK activity.

3 **Fig 4. Synergic effect of IF/HIIE on HK activity.** Enzymatic activity was calculated  
4 from NADPH production. (A) HK activity in liver. (B) HK activity in heart. (C) HK  
5 activity in skeletal muscle (gastrocnemius).  $p < 0.05$ ; a vs. control, b vs. HIIE, and c vs.  
6 IF.

### 7 **IF/HIIE synergic effect in physical activity and energy production**

8 The effect of HIIE promoting physiological adaptation in skeletal muscle is well  
9 described (14, 35). However, the effect of IF combined with HIIE in physical performance  
10 is not, although some reports that employed endurance training suggest a possible  
11 synergetic effect: I) Rodriguez-Bies et al. combined IF protocol with endurance exercises  
12 and observed a consistent increase in beta-oxidation, lactate production, and mitochondria  
13 content in gastrocnemius with a modest effect in physical performance in animals submitted  
14 to both protocols compared to the control group (36). II) Moraes et al. showed preserved  
15 muscle mass in animals submitted to an IF protocol allied to endurance exercises (37).  
16 However, the physical capacity of these animals was not evaluated in the latter. To  
17 investigate a possible physical improvement promoted by IF and/or HIIE along the  
18 experimental procedures, we submitted all groups to a physical test (PT) on three days (Fig  
19 5A): 1st) one day before day 0; 2nd) at day 28; 3rd) at day 56 (end of the IF and HIIE  
20 protocols). The 3rd test revealed a higher performance of animals in the HIIE and IF/HIIE  
21 groups that was approximately 90% and 180% in comparison to control, respectively. The  
22 possibility that the weight of the animals from IF and IF/HIIE groups contributing to the  
23 outcome of the PT was eliminated since no correlation was observed between swimming  
24 time and weight of the animals in any of the PTs (S1 Fig).

1 **Fig 5. Physical test and energy production.** (A) Physical test. The physical endurance  
2 was measured using swim until fatigue test (under a 12% bw overload). The tests were  
3 applied on three separate occasions: (1st) one day before day 0, (2nd) at day 28, and (3rd)  
4 at day 56. (B) FoF1 ATP synthase activity was estimated through the ATPase activity of  
5 the enzyme. (C) NAD(P)H autofluorescence was measured directly in fresh muscle  
6 homogenates (gastrocnemius). The excitation and emission wavelengths were 340 nm and  
7 450 nm, respectively.  $p < 0.05$ ; a vs. control, b vs. HIIE, and c vs. IF.

8 Furthermore, to explore any possible adaptation that granted IF/HIIE group the  
9 best results in the physical test, we measured the activity of the FoF1 ATP synthase in  
10 the skeletal muscle of these animals (Fig 5B). We observed an approximately 50%  
11 increase in FoF1 activity in IF/HIIE group compared to the other groups. According to  
12 the literature, both IF (36) and HIIE (38, 39) alone could promote adaptations in  
13 mitochondria. To access the mitochondria oxidation profile, we measured the NAD(P)H  
14 content in skeletal muscle of the groups (Fig 5C). Within mitochondria, NADH maintains  
15 a supply of protons for the redox couples of the electron transport chain. Blockade of the  
16 electron transport slows the rate of NADH oxidation and raises NADH/NAD ratio; lower  
17 NADH/NAD ratio should be accompanied by higher NADH oxidation and improved  
18 electron transport (40). As it is not possible to distinguish between the fluorescence of  
19 NADH and NAD(P)H or between cytosolic and mitochondrial nucleotides, the  
20 fluorescence signal was referred to as NAD(P)H. The bulk of the measurement was  
21 assumed to be from mitochondria since cytosolic NADH and NAD(P)H contribute in  
22 general less than 20% of the signal under these conditions (41). Only the IF/HIIE group  
23 presented a more oxidative profile, ratifying ATP synthase enhancement observed in  
24 IF/HIIE group.

## 1 **Synergic effect of IF/HIIE in muscle fiber mitochondria respiratory** 2 **states**

3 To investigate how the skeletal muscle mitochondrial respiratory complexes could  
4 be affected by IF and/or HIIE protocols, we measured the different respiratory states and  
5 the mitochondria respiratory control rate (RCR) (Fig 6). RCR is an reliable indicator of  
6 mitochondria function, as high RCR usually indicates healthy mitochondria and low  
7 RCR usually indicates mitochondrial dysfunction (42). Initially, we analyzed muscle  
8 fiber mitochondria oxygen consumption in the presence of complex I substrate, complex  
9 II substrate, and ADP (State 3). We observed a higher O<sub>2</sub> flux rate related to ATP  
10 production in IF/HIIE group, followed by both HIIE and IF groups individually, in  
11 comparison to the C group (Fig 6A). In the sequence, we added ATP synthase inhibitor  
12 (State 4o). HIIE group presented a higher O<sub>2</sub> flux (Fig 6B), indicative of increased proton  
13 leakage and/or extra-mitochondrial O<sub>2</sub> consumption. In contrast, IF and IF/HIIE groups  
14 presented a lower O<sub>2</sub> flux in comparison to C group (Fig 6B). Next, FCCP was added to  
15 uncouple O<sub>2</sub> flux to ATP production (State uncoupled). The IF/HIIE group presented  
16 higher values in comparison with the other groups (Fig 6C), indicative of an augmented  
17 number of respiratory complexes and/or mitochondrial mass. The RCR calculated values  
18 were greatest in the IF/HIIE group followed by the IF group, both of which were  
19 significantly greater than the values of C and HIIE groups that were nearly equal (Fig  
20 6D).

21 **Fig 6. IF/HIIE promotes mitochondria activation in permeabilized skeletal muscle**  
22 **fiber bundles.** Respiration measurements were performed on gastrocnemius fiber  
23 bundles using a high-resolution respirometry. The results were normalized to the wet  
24 weight of the permeabilized fiber bundles. (A) State 3 O<sub>2</sub> flux. State 3 was measured  
25 after addition of complex I and II substrates and ADP. (B) State 4o O<sub>2</sub> flux. State 4o was  
26 measured subsequently to the State 3 after addition of oligomycin to mimic real State 4

1 (depletion of ADP). (C) State uncoupled O<sub>2</sub> flux. State uncoupled was measured in the  
2 sequence of state 3 and state 4o through addition of FCCP. (D) RCR calculation. RCR  
3 was calculated by State 3 divided by State 4o.  $p < 0.05$ ; a vs. control, b vs. HIIE, and c  
4 vs. IF.

5 The results above are indicative of an improved O<sub>2</sub> flux and ATP production  
6 coupling in the IF/HIIE and IF groups. The respiratory profile of the IF/HIIE group  
7 resembles data from a different group that observed an augmented mass of mitochondrial  
8 in skeletal muscle using a dissimilar exercise protocol (36). Finally, the greater RCR  
9 value agrees with a more oxidative profile and active FoF1 synthase that was observed  
10 exclusively in IF/HIIE group.

## 11 **Overall oxidative stress markers are reduced in IF/HIIE group**

12 High intensity exercise was clearly demonstrated to negatively modulate the  
13 muscular redox state with a resultant increase in lipid peroxidation (43). However, the  
14 adoption of HIIE models was also shown to induce positive effects in muscular  
15 physiology (reviewed in MacInnis and Gibala (44)). We hypothesized that in addition to  
16 local effects promoted by HIIE in skeletal muscle, it could also affect the overall redox  
17 state with a modulation in oxidative stress markers and, in combination with IF, could  
18 possibly generate a synergistic effect.

19 To investigate the effect of IF and HIIE in the overall redox state, we measured the serum  
20 level of the oxidative stress damage markers lipid peroxidation and protein oxidation  
21 through malondialdehyde (MDA) quantification and protein carbonyl content,  
22 respectively. We observed a strong reduction in MDA levels only in IF/HIIE group (Fig  
23 7A) showing a synergic effect in prevention of lipid peroxidation. Furthermore, IF/HIIE  
24 group presented lower levels of serum protein oxidation followed by HIIE group (Fig  
25 7B). The IF group presented similar values as the control group for the oxidative markers

1 (Figs 7A and 7B) indicative of an absence of an increase in the oxidative stress protection  
2 in serum.

3 **Fig 7. IF/HIIE group presented lower levels of serum lipid peroxidation and protein**  
4 **oxidation.** Oxidative damage markers were measured in the serum through  
5 quantification of (A) lipid peroxidation (MDA) and (B) protein oxidation (PCC).  $p <$   
6  $0.05$ ; a vs. control, b vs. HIIE, and c vs. IF.

## 7 **Discussion**

8 Over the last few years, IF (10, 45) or HIIE (46, 47) protocols were individually  
9 evaluated aiming the potential to promote energy metabolism and physiologic  
10 adaptations. Different combinations of fasting regimens with a variety of exercise  
11 protocols were also employed (48), however, none of these studies has examined the  
12 interaction between IF and HIIE. Only recently, researchers have begun to recall the  
13 mechanism underneath IF and HIIE adaptations. One of the mechanisms that has been  
14 proposed is that IF shapes the microbiota in the gut and the adaptations to the microbiota  
15 can induce the same modifications when transplanted to a germ-free animal (12). For  
16 HIIE, a proteomic change has been proposed for skeletal muscle cells that are especially  
17 noticeable in mitochondria and ribosome protein profiles (49). These discoveries shed  
18 new light on IF and HIIE that motivated us to investigate a potential synergic effect from  
19 the combination of these strategies. To test this hypothesis, young adult Wistar rats (3-  
20 month-old) were submitted to 2 months of IF and/or HIIE (Fig 1) with an additional  
21 month of adaptation prior to the start of the study.

22 Initially, we observed that the IF fasting protocol promoted a pronounced  
23 protection against the weight gain observed in groups with food offered ad libitum (Fig  
24 2A). According to the literature, IF promotes activation of brown adipose tissue (12),  
25 however, no noticeable difference in size or weight of brown adipose tissue was observed  
26 in any of the groups (Fig 2B). In contrast, IF and IF/HIIE groups presented an



1 expressively low visceral fat mass (Fig 2C). We also weighed the liver and heart of the  
2 animals, as these organs can suffer lipid accumulation in some diseases (50). Animals in  
3 both the IF and IF/HIIE groups had smaller livers (Fig 2D) and hearts (Fig 2E) suggesting  
4 that the normal diet offered ad libitum can induce aspects of obesity in young adult rats.  
5 To investigate the possibility of muscular atrophy promoted by lack of physical activity  
6 combined with reduced food offer in IF group, the weight (Fig 2F) and the CSA of  
7 gastrocnemius were evaluated (Figs 2G and 2H). We observed lower weight and CSA of  
8 gastrocnemius from IF group comparing to C group, however, the IF group presented  
9 similar results to the C group in the physical tests (Fig 5A). Surprisingly, the IF/HIIE  
10 group showed an increase in myofibers CSA (Fig 2H), statistically higher than CSA  
11 measured in HIIE group, indicating a morphological adaptation promoted by the synergy  
12 of our IF/HIIE protocol. The latter may be explained due to a possible negative regulation  
13 on activin/myostatin signaling promoted by the IF protocol that could potentiates HIIE  
14 muscle adaptation. This hypothesis was raised based on recent data demonstrating that  
15 the inhibition of activin/myostatin signaling in mice results in skeletal muscle  
16 hypertrophy (51). Furthermore, in humans, acute fasting is known to promotes reduction  
17 of activins circulating levels (52-54), and possibly, the successive cycles of fasting  
18 promoted by the IF protocol could exacerbate this effect. However, the effect of IF on  
19 activin/myostatin signaling was not the aim of our study and should be proper  
20 investigated.

21 To evaluate the effects of IF and HIIE protocols on glucose metabolism, core of  
22 energetic processes (55), we started measuring the fasting blood glucose (Fig 3A), which  
23 showed similar values for all groups. Next, we measured glucose uptake via glucose  
24 tolerance test (Fig 3B) with AUC analysis (Fig 3C) and we detected a significantly faster  
25 uptake of glucose in IF/HIIE group, similarly to observed by other groups (20, 37).  
26 Additionally, we measured the fasting serum insulin levels and we observed a significant  
27 decrease of insulin levels in IF/HIIE group (53% reduction), followed by a smaller

1 reduction in insulin levels in IF group (37 % reduction). Lower levels of circulating  
2 insulin were also observed in mice over-expressing follistatin-like 3 (56), a natural  
3 blocker of activin/myostatin signaling, and possibly these groups (IF and IF/HIIE) may  
4 have higher levels of follistatin-like 3, that could corroborate the effect proposed above  
5 for IF in muscle hypertrophy through activin/myostatin signaling modulation.

6 To investigate the consequence of the observed increased in glucose uptake  
7 combined with low levels of circulating insulin in the downstream of glucose metabolism  
8 within the cellular milieu, we measured the activity of the first enzyme of the glycolysis,  
9 HK (Fig 4), whose activity is integrated with sugar transport (34). We observed a  
10 synergic effect from the combination of IF with HIIE protocols in liver HK with an  
11 ~130% increase versus the ~90% observed for both IF and HIIE alone (Fig 4A). In  
12 skeletal muscle HK, we observed a 3-fold greater HK activity in HIIE group compared  
13 to controls that increased to 6-fold with the combination of HIIE with IF (Fig 4C).  
14 Remarkably, the IF protocol alone showed no promotion of any adaptations in muscle  
15 HK activity, yet its combination with HIIE doubled the HK activity in the IF/HIIE group.  
16 In contrast, the activation of HK activity in the heart showed an association only with the  
17 inclusion of the IF protocol (IF and IF/HIIE groups; Fig 4B). This probably reflects an  
18 effect of high acetate serum levels as described by Li, Xie (12) in work that used a similar  
19 IF protocol. Furthermore, they also observed an increased level of circulating lactate  
20 however we discard the influence of intracellular lactate since lactate were demonstrated  
21 to reduce hexokinase activity (57).

22 The HK activity is closely connected with mitochondrial activity, since the  
23 muscular isoform of this enzyme can bind to the mitochondrial membrane through  
24 VDAC (58) that can positively modulate the activities of both (59). To identify a possible  
25 consequence from the strong activation of HK in muscle of the IF/HIIE group, we  
26 initially compared the results of the physical endurance test (Fig 5A). The advantage  
27 gained in performance by the combination of the IF and HIIE protocols group was

1 patently observable. To more deeply explore the possible molecular adaptations  
2 promoted by the synergism of IF and HIIE, the mitochondria FoF1 ATP synthase in  
3 gastrocnemius muscle was measured in the groups (Fig 5B). The IF/HIIE protocol  
4 promoted an ~50% increase in FoF1 ATP synthase compared to the other groups. This  
5 effect is in agreement with the muscle HK results observed in IF/HIIE group (Fig 3C).  
6 To further confirm the possible mitochondrial activation, we measured the NAD(P)H  
7 content of the gastrocnemius of the groups (Fig 5C). Only the IF/HIIE group showed a  
8 significant reduction in the NAD(P)H content suggesting the presence of more oxidative  
9 mitochondria (60). Recently, a study combining intermittent food deprivation with an  
10 endurance running protocol for one month observed an increase in mitochondrial DNA  
11 and complex proteins along with mRNA for NRF1, NRF2 and TFAM (61). This  
12 evidence from the literature allied with the increased CSA (Figs 2G and 2H), higher FoF1  
13 ATP synthase activity (Fig 5B), and the more oxidative mitochondria (Fig 5C) observed  
14 in IF/HIIE group that indicate a synergic effect of the protocols leading to mitochondria  
15 biogenesis. This proposed increase in mitochondrial mass could explain the increased  
16 HK activity (Fig 4). Furthermore, Zhang et al. showed recently that c-Src plays an  
17 important role in HK activity in cancer cells reducing the  $K_m$  the  $V_{max}$ , and the tumor  
18 growth is dependent of HK. Moreover, this tyrosine kinase is known to be important  
19 during early embryonic stages as well as in ensuing differentiation processes (62, 63).  
20 Altogether, these tissue developmental effect of c-Src could explain the observed  
21 increase in muscle CSA (Figs 2G and 2H) and the increase in HK activity (Fig 4) but  
22 need to be further evaluated.

23 According to the literature, IF combined with diverse exercise protocols could  
24 increase AMPK and SIRT1 signaling in muscles (64) and possibly increase the  
25 mitochondrial mass (36). To directly test the effect of IF and/or HIIE on mitochondrial  
26 metabolism, we measured the  $O_2$  flux in muscle fibers (gastrocnemius) of the different  
27 groups with a high-resolution respirometry (65) (Fig 6). The results showed that the

1 IF/HIIE group presented higher values in both the State 3 (Fig 6A) and State uncoupled  
2 (Fig 6C), which are indicative of a higher mitochondrial mass and are in agreement with  
3 previous data from another group (36). Moreover, the IF and IF/HIIE groups possessed  
4 lower values for State 4o (Fig 6B) that suggests a lower proton leak and/or extra-  
5 mitochondrial O<sub>2</sub> consumption. The RCR calculation reinforces the idea of a more  
6 coupled mitochondria in the IF/HIIE group. The IF group also demonstrated an increased  
7 in RCR, however, even with more coupled mitochondria, this group failed to demonstrate  
8 higher levels of FoF1 ATP synthase activity (Fig 5B) probably due to a low mitochondria  
9 mass. Altogether, the activation of both HK and ATP synthase along with the more  
10 oxidative and coupled mitochondria observed in IF/HIIE group could lead to a reduction  
11 in reactive oxygen species (66) and an increased global antioxidant activity. To evaluate  
12 the possible effect of IF/HIIE in global antioxidant activity we measure the levels of  
13 serum oxidative stress markers (Fig 7). We observed that the IF/HIIE group presented  
14 with lower levels for lipid peroxidation (Fig 7A) and protein oxidation (Fig 7B), which  
15 agree with our previous hypothesis. Finally, though the data revealed here, the IF/HIIE  
16 protocol reveals a reasonable approach to be employed for translational investigation in  
17 humans, especially when considering the evolutionary-based proposal to combine IF and  
18 HIIE to mimics erratic food behavior and occasional high-intense energy demand of the  
19 gathering/hunting activities of our ancestors to improve metabolism. Different factors  
20 influence exercise tolerance in human population (specially to age and health status) and  
21 HIIE protocol must be adapted accordingly.

22

## 23 **Acknowledgments**

24 The authors would like to thank Dr. David William Provance, Jr. for his review of  
25 the English. We would also like to thank Prof. Mauro Sola-Penna for all the support with  
26 the sample preparations and experiment implementation.

27

## 1 **Funding**

2           This work was supported by the Fundação de Amparo à Pesquisa do Estado do Rio  
3 de Janeiro (FAPERJ) and Conselho Nacional de Desenvolvimento Científico e  
4 Tecnológico (CNPq).

## 6 **Author contributions**

7           ARH, CN and VPS designed research; CN, KR and DRF performed research;  
8 ARH, CN, KR, FC, DRF, AG and VPS analyzed data; ARH, AG and VPS contributed  
9 with new reagents or analytic tools; and ARH, FC and VPS wrote the article.  
10

## 11 **Disclosure statement**

12           The authors declare no conflict of interest.

## 1 Reference:

- 2 1. Alberti KG, Zimmet P, Shaw J, Group IDFETFC. The metabolic syndrome--a new  
3 worldwide definition. *Lancet*. 2005;366(9491):1059-62.
- 4 2. Marchesini G, Brizi M, Bianchi G, Tomassetti S, Bugianesi E, Lenzi M, et al.  
5 Nonalcoholic fatty liver disease: a feature of the metabolic syndrome. *Diabetes*.  
6 2001;50(8):1844-50.
- 7 3. Cameron AJ, Shaw JE, Zimmet PZ. The metabolic syndrome: prevalence in worldwide  
8 populations. *Endocrinology and metabolism clinics of North America*. 2004;33(2):351-75, table  
9 of contents.
- 10 4. Misra A, Khurana L. Obesity and the metabolic syndrome in developing countries. *The*  
11 *Journal of clinical endocrinology and metabolism*. 2008;93(11 Suppl 1):S9-30.
- 12 5. Abdelaal M, le Roux CW, Docherty NG. Morbidity and mortality associated with obesity.  
13 *Annals of translational medicine*. 2017;5(7):161.
- 14 6. Calzadilla Bertot L, Adams LA. The Natural Course of Non-Alcoholic Fatty Liver  
15 Disease. *International journal of molecular sciences*. 2016;17(5).
- 16 7. Blauw LL, Aziz NA, Tannemaat MR, Blauw CA, de Craen AJ, Pijl H, et al. Diabetes  
17 incidence and glucose intolerance prevalence increase with higher outdoor temperature. *BMJ*  
18 *open diabetes research & care*. 2017;5(1):e000317.
- 19 8. An R, Ji M, Zhang S. Global warming and obesity: a systematic review. *Obesity reviews*  
20 : an official journal of the International Association for the Study of Obesity. 2017.
- 21 9. Kahlmeier S, Wijnhoven TM, Alpiger P, Schweizer C, Breda J, Martin BW. National  
22 physical activity recommendations: systematic overview and analysis of the situation in  
23 European countries. *BMC public health*. 2015;15:133.
- 24 10. Fontana L, Partridge L. Promoting health and longevity through diet: from model  
25 organisms to humans. *Cell*. 2015;161(1):106-18.
- 26 11. Touati S, Meziri F, Devaux S, Berthelot A, Touyz RM, Laurant P. Exercise reverses  
27 metabolic syndrome in high-fat diet-induced obese rats. *Medicine and science in sports and*  
28 *exercise*. 2011;43(3):398-407.
- 29 12. Li G, Xie C, Lu S, Nichols RG, Tian Y, Li L, et al. Intermittent Fasting Promotes White  
30 Adipose Browning and Decreases Obesity by Shaping the Gut Microbiota. *Cell metabolism*.  
31 2017;26(4):672-85 e4.
- 32 13. Laursen PB, Marsh SA, Jenkins DG, Coombes JS. Manipulating training intensity and  
33 volume in already well-trained rats: effect on skeletal muscle oxidative and glycolytic enzymes  
34 and buffering capacity. *Applied physiology, nutrition, and metabolism = Physiologie appliquee,*  
35 *nutrition et metabolisme*. 2007;32(3):434-42.
- 36 14. Bexfield NA, Parcell AC, Nelson WB, Foote KM, Mack GW. Adaptations to high-  
37 intensity intermittent exercise in rodents. *J Appl Physiol (1985)*. 2009;107(3):749-54.
- 38 15. Blumberg Y, Ertracht O, Gershon I, Bachner-Hinenzon N, Reuveni T, Atar S. High-  
39 Intensity Training Improves Global and Segmental Strains in Severe Congestive Heart Failure.  
40 *Journal of cardiac failure*. 2017;23(5):392-402.
- 41 16. Li C, Sadraie B, Steckhan N, Kessler C, Stange R, Jeitler M, et al. Effects of A One-  
42 week Fasting Therapy in Patients with Type-2 Diabetes Mellitus and Metabolic Syndrome - A  
43 Randomized Controlled Explorative Study. *Experimental and clinical endocrinology & diabetes*  
44 : official journal, German Society of Endocrinology [and] German Diabetes Association. 2017.

- 1 17. Huh JY, Siopi A, Mougios V, Park KH, Mantzoros CS. Irisin in response to exercise in  
2 humans with and without metabolic syndrome. *The Journal of clinical endocrinology and*  
3 *metabolism*. 2015;100(3):E453-7.
- 4 18. Longo VD, Panda S. Fasting, Circadian Rhythms, and Time-Restricted Feeding in  
5 Healthy Lifespan. *Cell metabolism*. 2016;23(6):1048-59.
- 6 19. Cordain L, Gotshall RW, Eaton SB, Eaton SB, 3rd. Physical activity, energy expenditure  
7 and fitness: an evolutionary perspective. *International journal of sports medicine*.  
8 1998;19(5):328-35.
- 9 20. Davis RAH, Halbrooks JE, Watkins EE, Fisher G, Hunter GR, Nagy TR, et al. High-  
10 intensity interval training and calorie restriction promote remodeling of glucose and lipid  
11 metabolism in diet-induced obesity. *American journal of physiology Endocrinology and*  
12 *metabolism*. 2017;313(2):E243-E56.
- 13 21. Aksungar FB, Sarikaya M, Coskun A, Serteser M, Unsal I. Comparison of Intermittent  
14 Fasting Versus Caloric Restriction in Obese Subjects: A Two Year Follow-Up. *The journal of*  
15 *nutrition, health & aging*. 2017;21(6):681-5.
- 16 22. Chang PY, Jensen J, Printz RL, Granner DK, Ivy JL, Moller DE. Overexpression of  
17 hexokinase II in transgenic mice. Evidence that increased phosphorylation augments muscle  
18 glucose uptake. *The Journal of biological chemistry*. 1996;271(25):14834-9.
- 19 23. BeltrandelRio H, Wilson JE. Hexokinase of rat brain mitochondria: relative importance  
20 of adenylate kinase and oxidative phosphorylation as sources of substrate ATP, and  
21 interaction with intramitochondrial compartments of ATP and ADP. *Archives of biochemistry*  
22 *and biophysics*. 1991;286(1):183-94.
- 23 24. Sengupta P. The Laboratory Rat: Relating Its Age With Human's. *Int J Prev Med*.  
24 2013;4(6):624-30.
- 25 25. Lui JC, Forcinito P, Chang M, Chen W, Barnes KM, Baron J. Coordinated postnatal  
26 down-regulation of multiple growth-promoting genes: evidence for a genetic program limiting  
27 organ growth. *FASEB journal : official publication of the Federation of American Societies for*  
28 *Experimental Biology*. 2010;24(8):3083-92.
- 29 26. Terada S, Yokozeki T, Kawanaka K, Ogawa K, Higuchi M, Ezaki O, et al. Effects of  
30 high-intensity swimming training on GLUT-4 and glucose transport activity in rat skeletal  
31 muscle. *J Appl Physiol (1985)*. 2001;90(6):2019-24.
- 32 27. Ceglia L, Niramitmahapanya S, Price LL, Harris SS, Fielding RA, Dawson-Hughes B.  
33 An evaluation of the reliability of muscle fiber cross-sectional area and fiber number  
34 measurements in rat skeletal muscle. *Biological procedures online*. 2013;15(1):6.
- 35 28. Rogers GW, Brand MD, Petrosyan S, Ashok D, Elorza AA, Ferrick DA, et al. High  
36 throughput microplate respiratory measurements using minimal quantities of isolated  
37 mitochondria. *PloS one*. 2011;6(7):e21746.
- 38 29. Zini R, Morin C, Bertelli A, Bertelli AA, Tillement JP. Effects of resveratrol on the rat  
39 brain respiratory chain. *Drugs under experimental and clinical research*. 1999;25(2-3):87-97.
- 40 30. Patsoukis N, Zervoudakis G, Panagopoulos NT, Georgiou CD, Angelatou F, Matsokis  
41 NA. Thiol redox state (TRS) and oxidative stress in the mouse hippocampus after  
42 pentylenetetrazol-induced epileptic seizure. *Neuroscience letters*. 2004;357(2):83-6.
- 43 31. Esterbauer H, Cheeseman KH. Determination of aldehydic lipid peroxidation products:  
44 malonaldehyde and 4-hydroxynonenal. *Methods in enzymology*. 1990;186:407-21.
- 45 32. Clamp LD, Hume DJ, Lambert EV, Kroff J. Enhanced insulin sensitivity in successful,  
46 long-term weight loss maintainers compared with matched controls with no weight loss history.  
47 *Nutrition & diabetes*. 2017;7(6):e282.

- 1 33. Matthaei S, Stumvoll M, Kellerer M, Haring HU. Pathophysiology and pharmacological  
2 treatment of insulin resistance. *Endocrine reviews*. 2000;21(6):585-618.
- 3 34. Naftalin RJ, Rist RJ. Evidence that activation of 2-deoxy-D-glucose transport in rat  
4 thymocyte suspensions results from enhanced coupling between transport and hexokinase  
5 activity. *The Biochemical journal*. 1989;260(1):143-52.
- 6 35. Cochran AJ, Percival ME, Tricarico S, Little JP, Cermak N, Gillen JB, et al. Intermittent  
7 and continuous high-intensity exercise training induce similar acute but different chronic  
8 muscle adaptations. *Experimental physiology*. 2014;99(5):782-91.
- 9 36. Rodriguez-Bies E, Santa-Cruz Calvo S, Fontan-Lozano A, Pena Amaro J, Berral de la  
10 Rosa FJ, Carrion AM, et al. Muscle physiology changes induced by every other day feeding  
11 and endurance exercise in mice: effects on physical performance. *PloS one*.  
12 2010;5(11):e13900.
- 13 37. Moraes RCM, Portari GV, Ferraz ASM, Silva TEO, Marocolo M, Jr. Effects of Intermittent  
14 Fasting and Chronic Swimming Exercise on Body Composition and Lipid Metabolism. *Applied  
15 physiology, nutrition, and metabolism = Physiologie appliquee, nutrition et metabolisme*. 2017.
- 16 38. Wu LH, Chang SC, Fu TC, Huang CH, Wang JS. High-intensity Interval Training  
17 Improves Mitochondrial Function and Suppresses Thrombin Generation in Platelets  
18 undergoing Hypoxic Stress. *Scientific reports*. 2017;7(1):4191.
- 19 39. Ramos-Filho D, Chicaybam G, de-Souza-Ferreira E, Guerra Martinez C, Kurtenbach  
20 E, Casimiro-Lopes G, et al. High Intensity Interval Training (HIIT) Induces Specific Changes  
21 in Respiration and Electron Leakage in the Mitochondria of Different Rat Skeletal Muscles.  
22 *PloS one*. 2015;10(6):e0131766.
- 23 40. Duchen MR, Biscoe TJ. Mitochondrial function in type I cells isolated from rabbit arterial  
24 chemoreceptors. *The Journal of physiology*. 1992;450:13-31.
- 25 41. Chance B, Schoener B, Oshino R, Itshak F, Nakase Y. Oxidation-reduction ratio studies  
26 of mitochondria in freeze-trapped samples. NADH and flavoprotein fluorescence signals. *The  
27 Journal of biological chemistry*. 1979;254(11):4764-71.
- 28 42. Brand MD, Nicholls DG. Assessing mitochondrial dysfunction in cells. *The Biochemical  
29 journal*. 2011;435(2):297-312.
- 30 43. Alessio HM, Goldfarb AH, Cutler RG. MDA content increases in fast- and slow-twitch  
31 skeletal muscle with intensity of exercise in a rat. *The American journal of physiology*.  
32 1988;255(6 Pt 1):C874-7.
- 33 44. MacInnis MJ, Gibala MJ. Physiological adaptations to interval training and the role of  
34 exercise intensity. *The Journal of physiology*. 2017;595(9):2915-30.
- 35 45. Longo VD, Mattson MP. Fasting: molecular mechanisms and clinical applications. *Cell  
36 metabolism*. 2014;19(2):181-92.
- 37 46. Burgomaster KA, Howarth KR, Phillips SM, Rakobowchuk M, Macdonald MJ, McGee  
38 SL, et al. Similar metabolic adaptations during exercise after low volume sprint interval and  
39 traditional endurance training in humans. *The Journal of physiology*. 2008;586(1):151-60.
- 40 47. Irving BA, Short KR, Nair KS, Stump CS. Nine days of intensive exercise training  
41 improves mitochondrial function but not insulin action in adult offspring of mothers with type 2  
42 diabetes. *The Journal of clinical endocrinology and metabolism*. 2011;96(7):E1137-41.
- 43 48. Jaspers RT, Zillikens MC, Friesema EC, delli Paoli G, Bloch W, Uitterlinden AG, et al.  
44 Exercise, fasting, and mimetics: toward beneficial combinations? *FASEB journal : official  
45 publication of the Federation of American Societies for Experimental Biology*. 2017;31(1):14-  
46 28.
- 47 49. Robinson MM, Dasari S, Konopka AR, Johnson ML, Manjunatha S, Esponda RR, et al.  
48 Enhanced Protein Translation Underlies Improved Metabolic and Physical Adaptations to



- 1 Different Exercise Training Modes in Young and Old Humans. *Cell metabolism*.
- 2 2017;25(3):581-92.
- 3 50. Fouad YM, Yehia R. Hepato-cardiac disorders. *World journal of hepatology*.
- 4 2014;6(1):41-54.
- 5 51. Morvan F, Rondeau JM, Zou C, Minetti G, Scheufler C, Scharenberg M, et al. Blockade
- 6 of activin type II receptors with a dual anti-ActRIIA/IIB antibody is critical to promote maximal
- 7 skeletal muscle hypertrophy. *Proceedings of the National Academy of Sciences of the United*
- 8 *States of America*. 2017;114(47):12448-53.
- 9 52. Moragianni VA, Aronis KN, Chamberland JP, Mantzoros CS. Short-term energy
- 10 deprivation alters activin a and follistatin but not inhibin B levels of lean healthy women in a
- 11 leptin-independent manner. *The Journal of clinical endocrinology and metabolism*.
- 12 2011;96(12):3750-8.
- 13 53. Vamvini MT, Aronis KN, Chamberland JP, Mantzoros CS. Energy deprivation alters in
- 14 a leptin- and cortisol-independent manner circulating levels of activin A and follistatin but not
- 15 myostatin in healthy males. *The Journal of clinical endocrinology and metabolism*.
- 16 2011;96(11):3416-23.
- 17 54. Perakakis N, Upadhyay J, Ghaly W, Chen J, Chrysafi P, Anastasilakis AD, et al.
- 18 Regulation of the activins-follistatins-inhibins axis by energy status: Impact on reproductive
- 19 function. *Metabolism: clinical and experimental*. 2018.
- 20 55. van Heerden JH, Bruggeman FJ, Teusink B. Multi-tasking of biosynthetic and energetic
- 21 functions of glycolysis explained by supply and demand logic. *BioEssays : news and reviews*
- 22 *in molecular, cellular and developmental biology*. 2015;37(1):34-45.
- 23 56. Brandt C, Hansen RH, Hansen JB, Olsen CH, Galle P, Mandrup-Poulsen T, et al. Over-
- 24 expression of Follistatin-like 3 attenuates fat accumulation and improves insulin sensitivity in
- 25 mice. *Metabolism: clinical and experimental*. 2015;64(2):283-95.
- 26 57. Leite TC, Coelho RG, Da Silva D, Coelho WS, Marinho-Carvalho MM, Sola-Penna M.
- 27 Lactate downregulates the glycolytic enzymes hexokinase and phosphofructokinase in diverse
- 28 tissues from mice. *FEBS letters*. 2011;585(1):92-8.
- 29 58. Nakashima RA, Mangan PS, Colombini M, Pedersen PL. Hexokinase receptor complex
- 30 in hepatoma mitochondria: evidence from N,N'-dicyclohexylcarbodiimide-labeling studies for
- 31 the involvement of the pore-forming protein VDAC. *Biochemistry*. 1986;25(5):1015-21.
- 32 59. Viitanen PV, Geiger PJ, Erickson-Viitanen S, Bessman SP. Evidence for functional
- 33 hexokinase compartmentation in rat skeletal muscle mitochondria. *The Journal of biological*
- 34 *chemistry*. 1984;259(15):9679-86.
- 35 60. Mayevsky A, Rogatsky GG. Mitochondrial function in vivo evaluated by NADH
- 36 fluorescence: from animal models to human studies. *American journal of physiology Cell*
- 37 *physiology*. 2007;292(2):C615-40.
- 38 61. Marosi K, Moehl K, Navas-Enamorado I, Mitchell SJ, Zhang Y, Lehrmann E, et al.
- 39 Metabolic and molecular framework for the enhancement of endurance by intermittent food
- 40 deprivation. *FASEB journal : official publication of the Federation of American Societies for*
- 41 *Experimental Biology*. 2018:fj201701378RR.
- 42 62. Sorge JP, Sorge LK, Maness PF. pp60c-src is expressed in human fetal and adult brain.
- 43 *Am J Pathol*. 1985;119(1):151-7.
- 44 63. Zhang J, Wang S, Jiang B, Huang L, Ji Z, Li X, et al. c-Src phosphorylation and
- 45 activation of hexokinase promotes tumorigenesis and metastasis. *Nature communications*.
- 46 2017;8:13732.

- 1 64. Canto C, Jiang LQ, Deshmukh AS, Matakı C, Coste A, Lagouge M, et al.  
2 Interdependence of AMPK and SIRT1 for metabolic adaptation to fasting and exercise in  
3 skeletal muscle. *Cell metabolism*. 2010;11(3):213-9.
- 4 65. Pesta D, Gnaiger E. High-resolution respirometry: OXPHOS protocols for human cells  
5 and permeabilized fibers from small biopsies of human muscle. *Methods in molecular biology*.  
6 2012;810:25-58.
- 7 66. da-Silva WS, Gomez-Puyou A, de Gomez-Puyou MT, Moreno-Sanchez R, De Felice  
8 FG, de Meis L, et al. Mitochondrial bound hexokinase activity as a preventive antioxidant  
9 defense: steady-state ADP formation as a regulatory mechanism of membrane potential and  
10 reactive oxygen species generation in mitochondria. *The Journal of biological chemistry*.  
11 2004;279(38):39846-55.

12

13

## 14 **Supporting information**

15 **S1 Fig. Analysis of the correlation between animal weight and the swimming time**  
16 **to fatigue in each of the three Pts.** Individual values correlating weight and swimming  
17 time to fatigue for every animal obtained in each PT day were plotted and the correlation  
18 were analyzed and indicated in the figures.

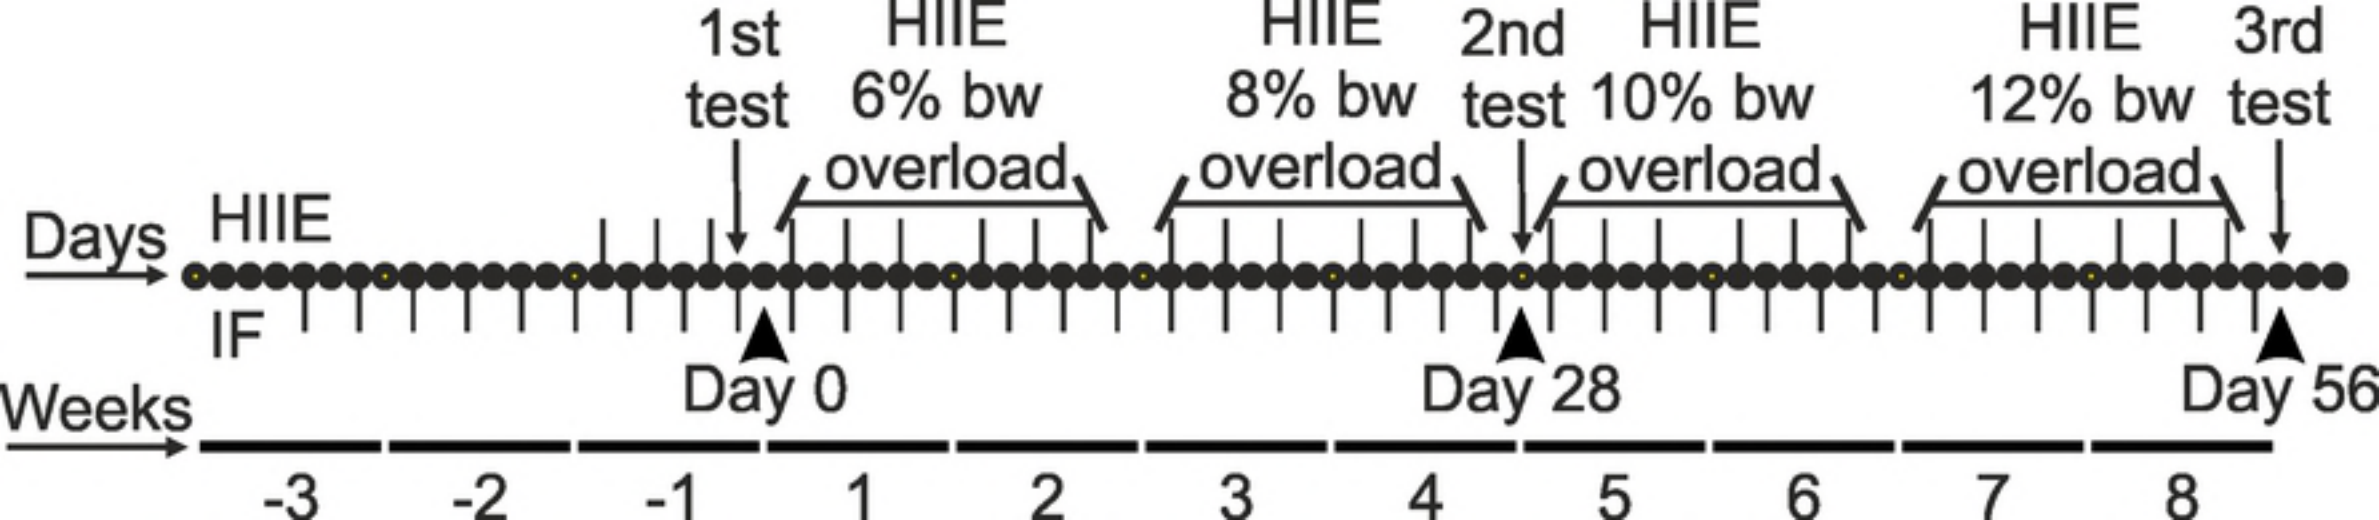

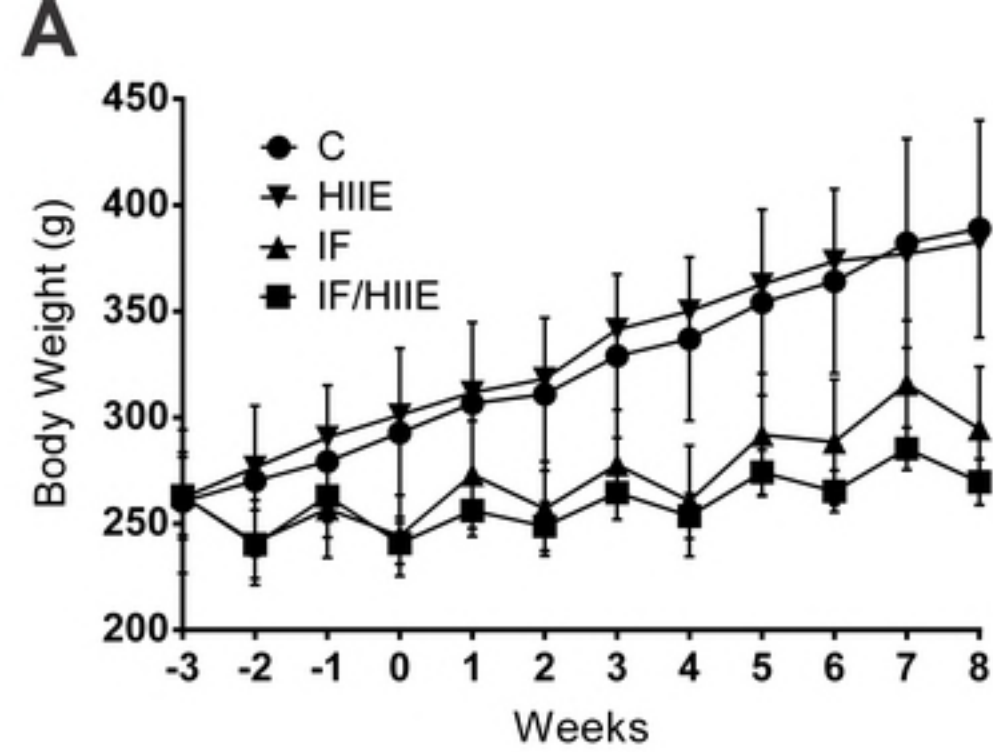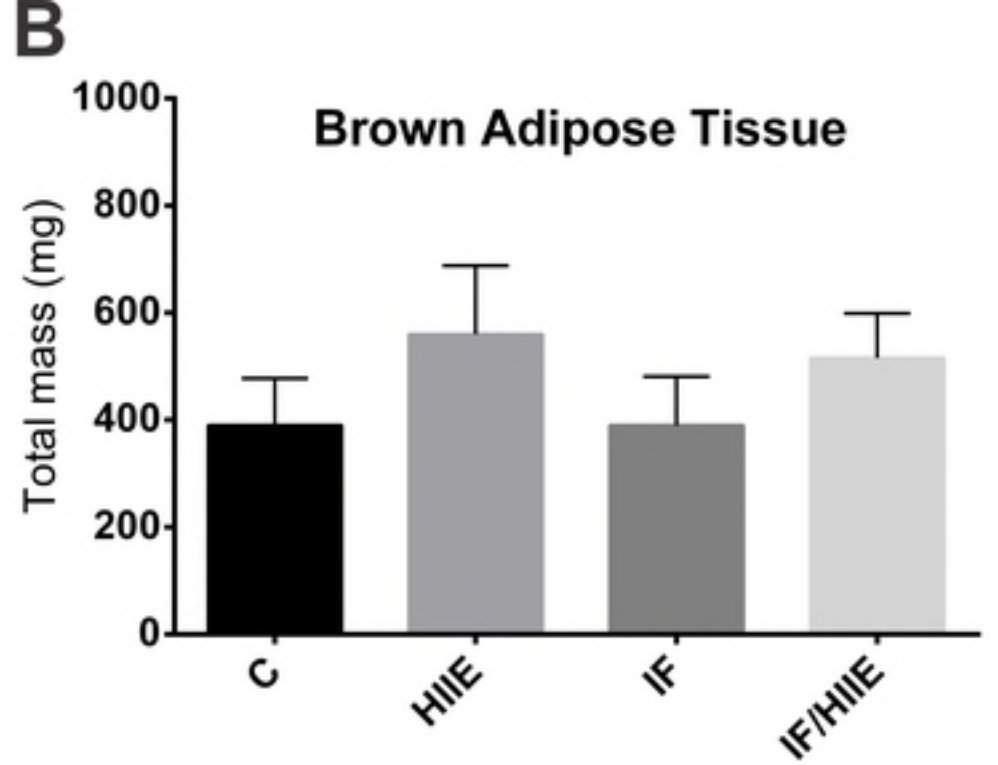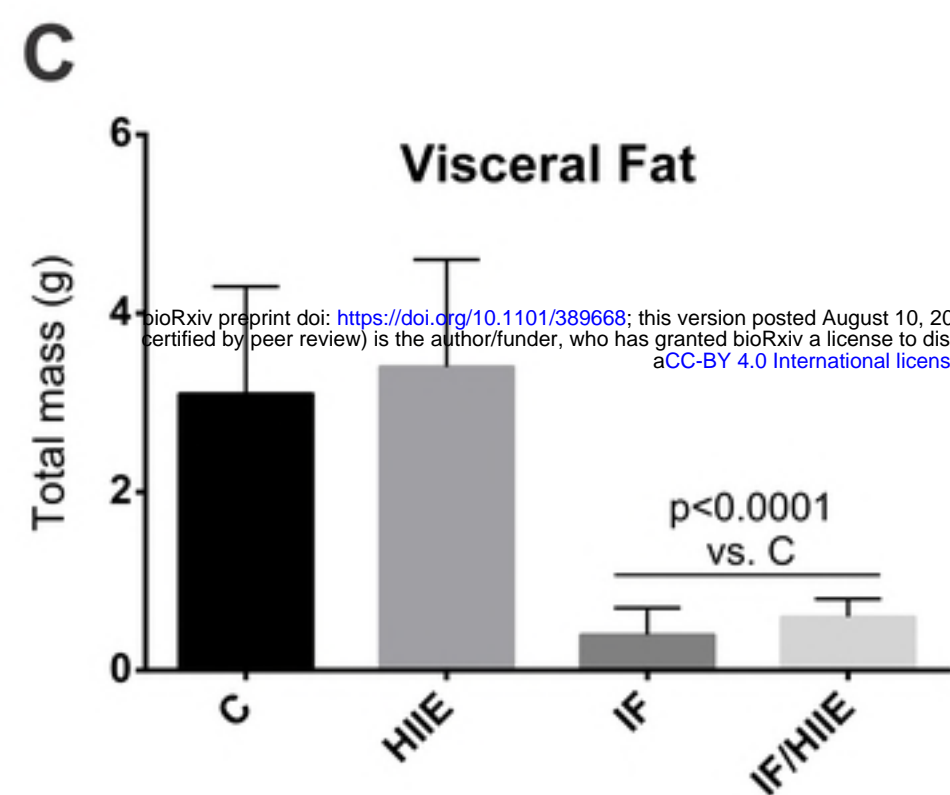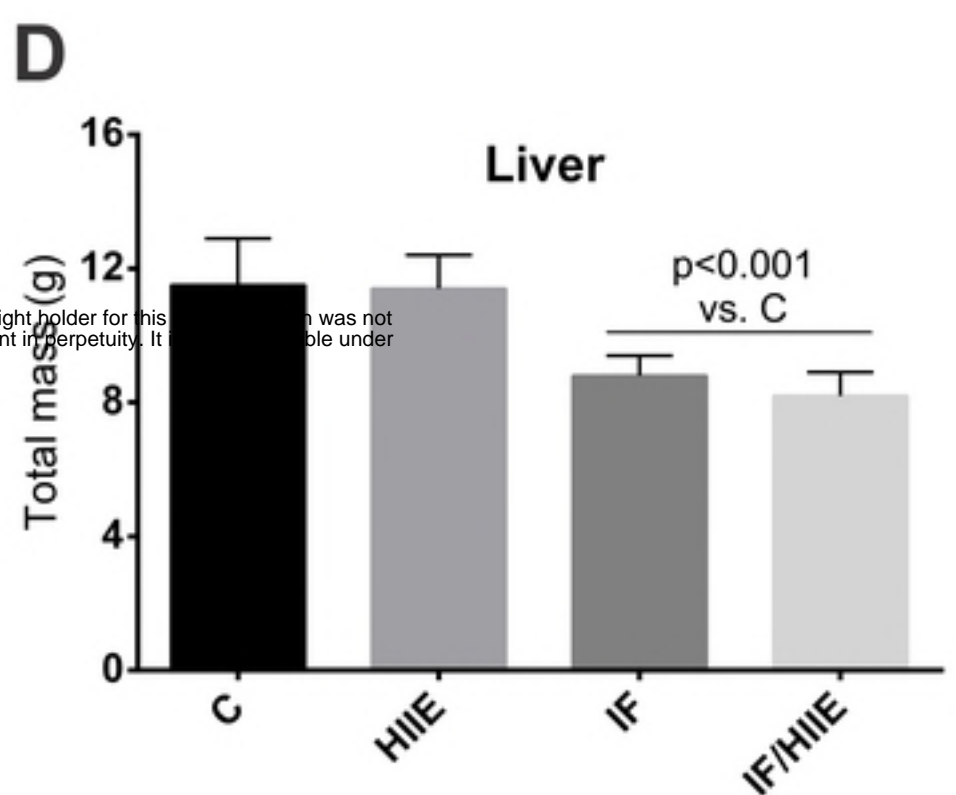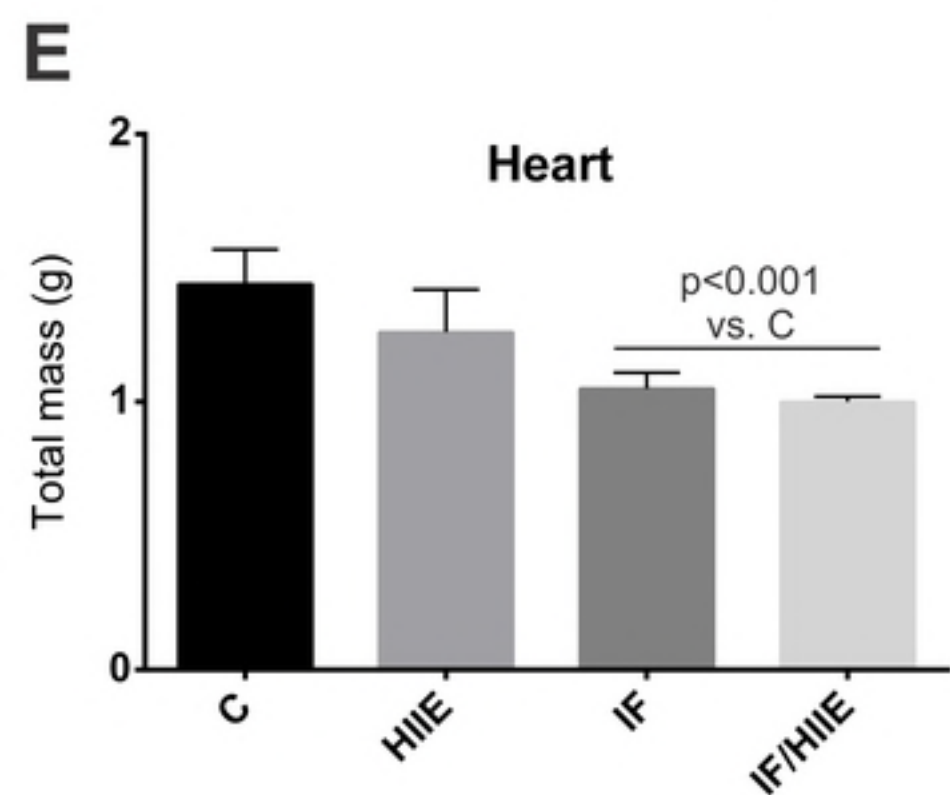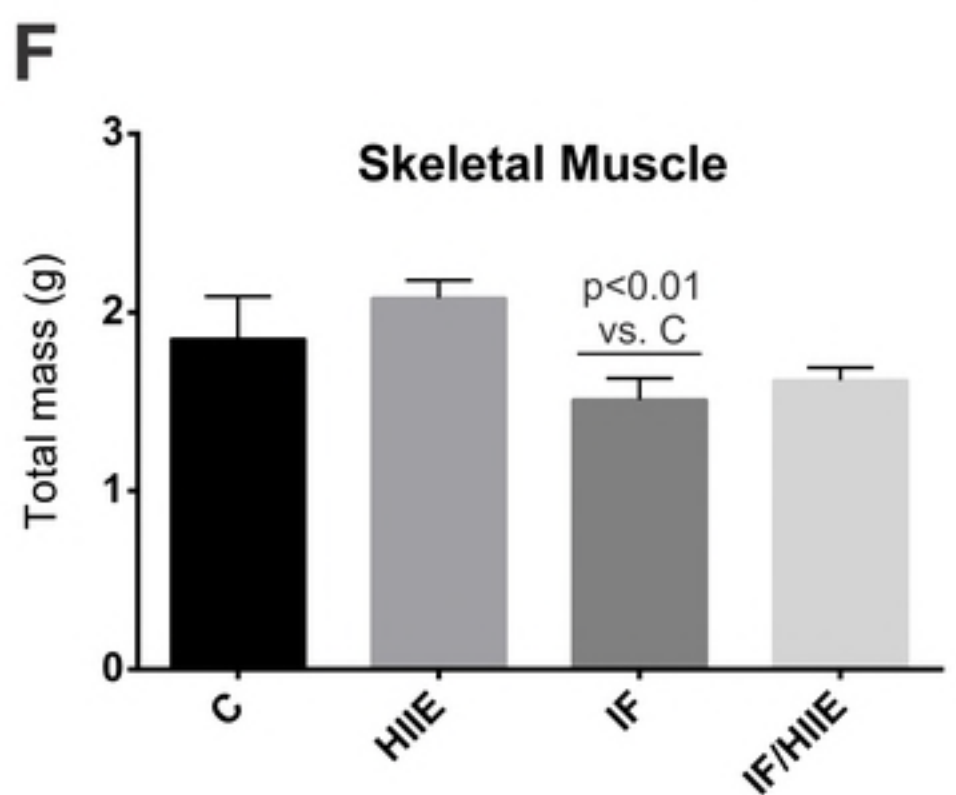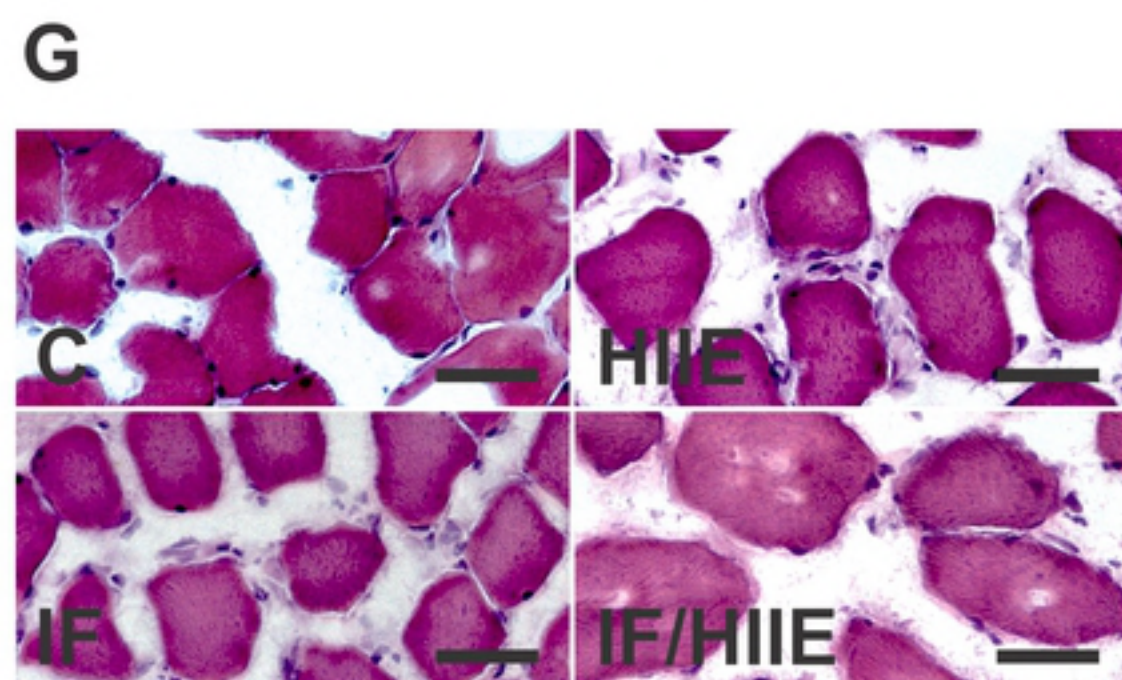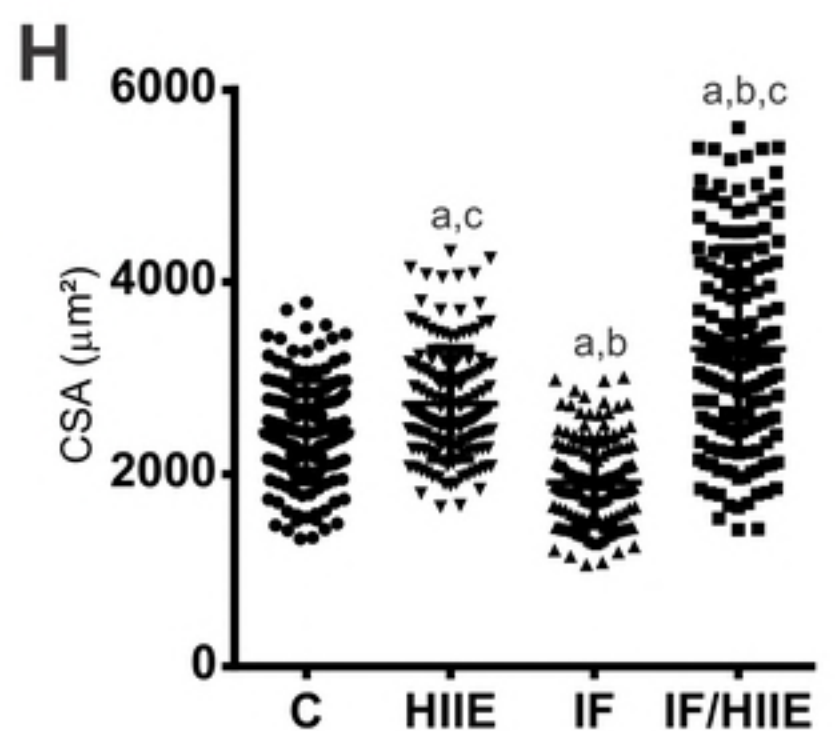

**A**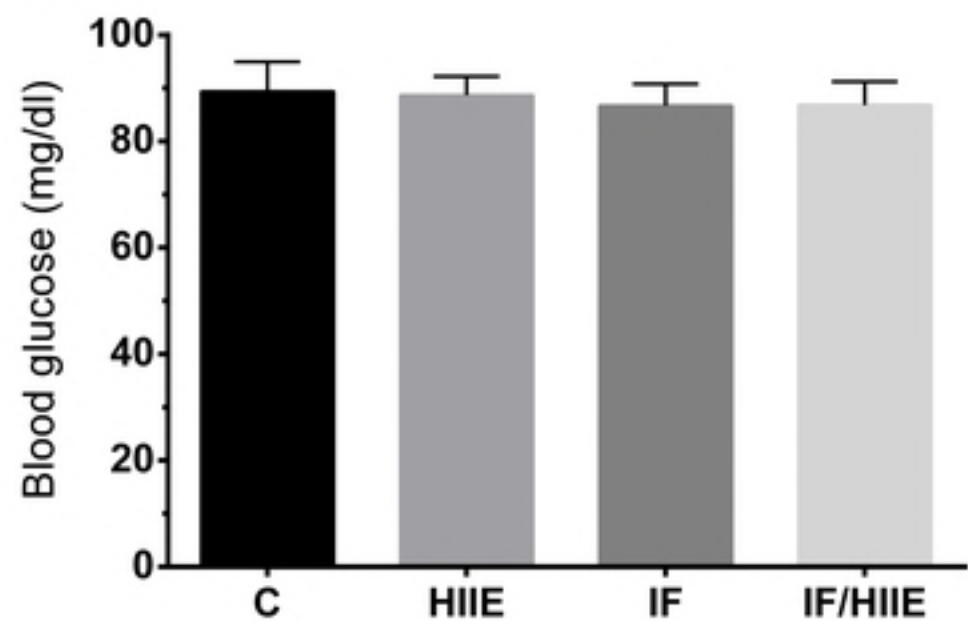**B**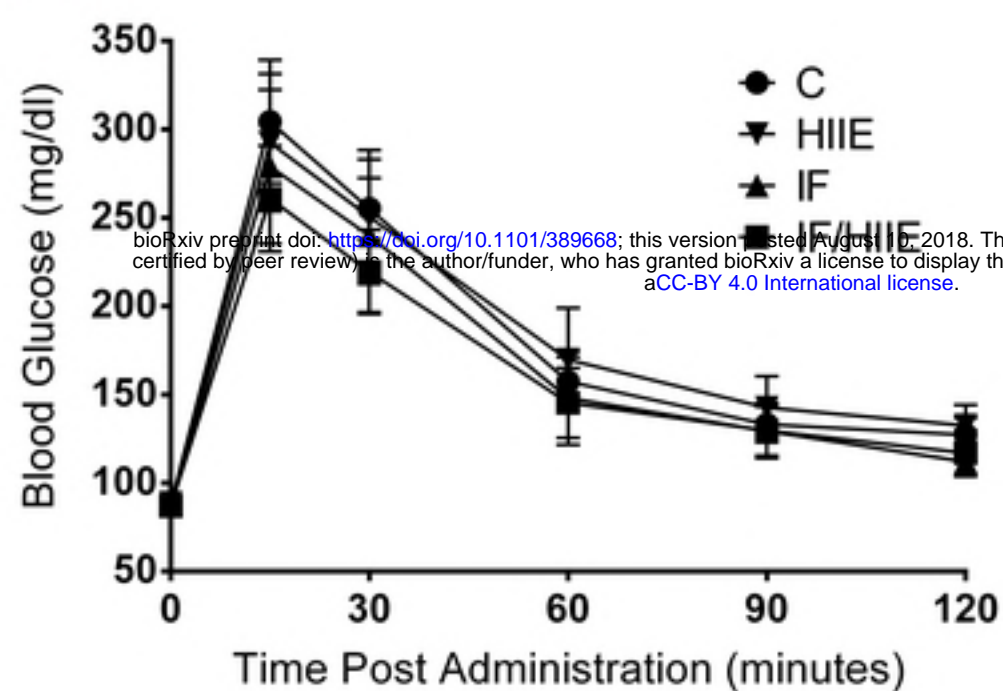**C**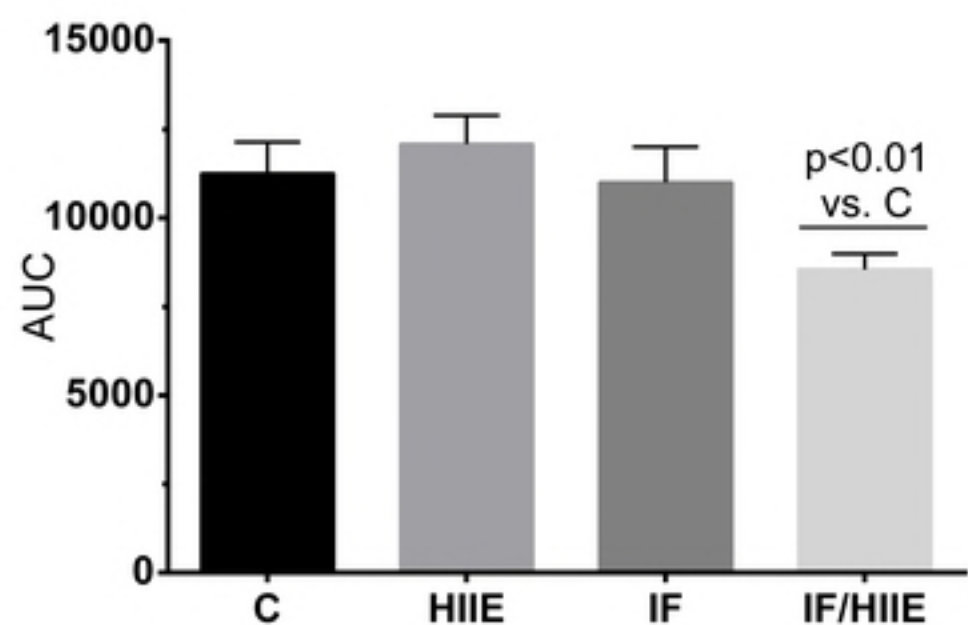**D**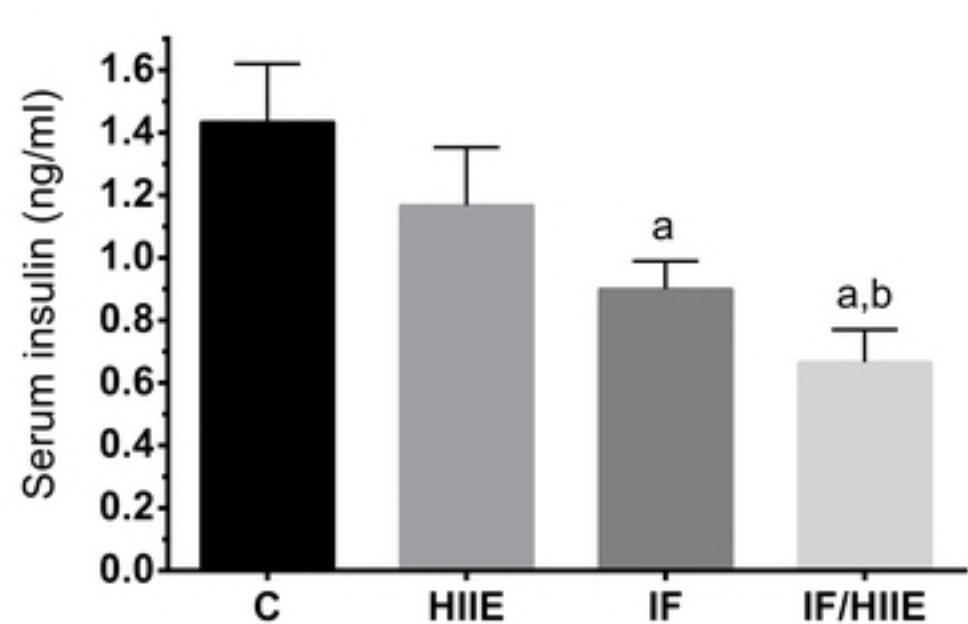

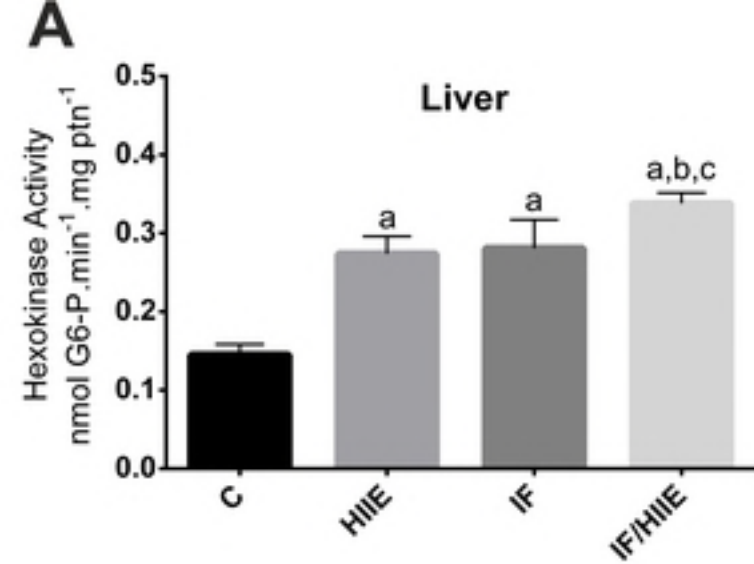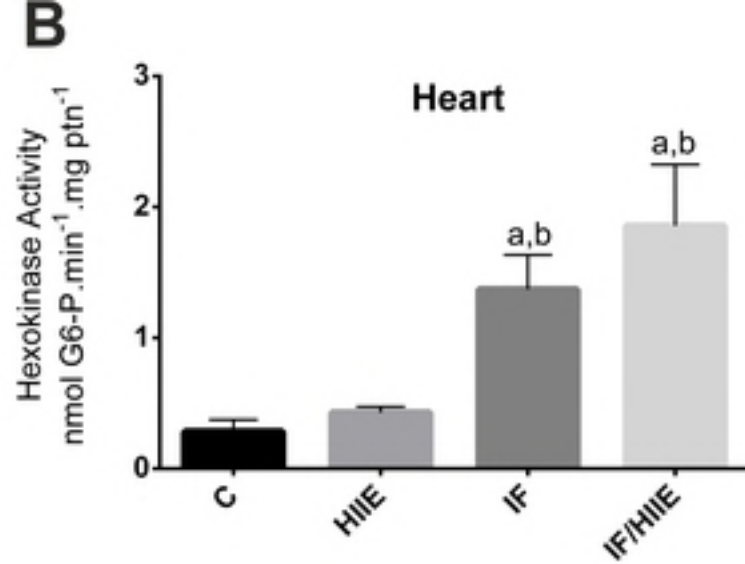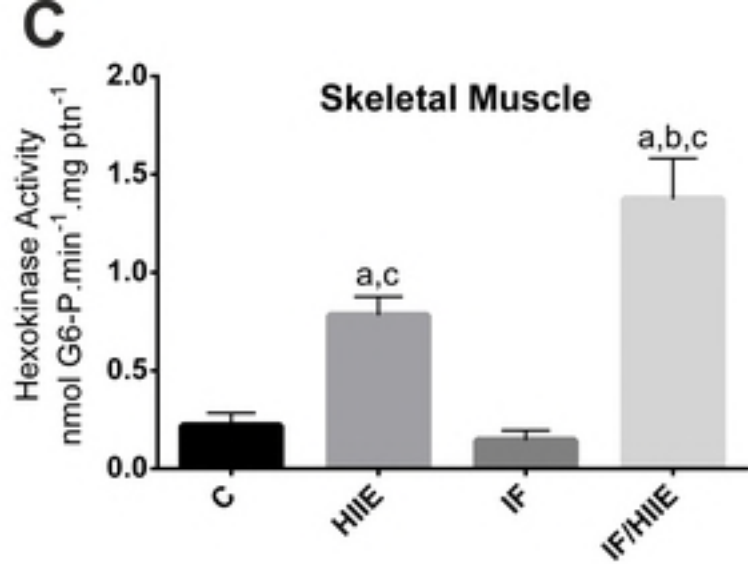

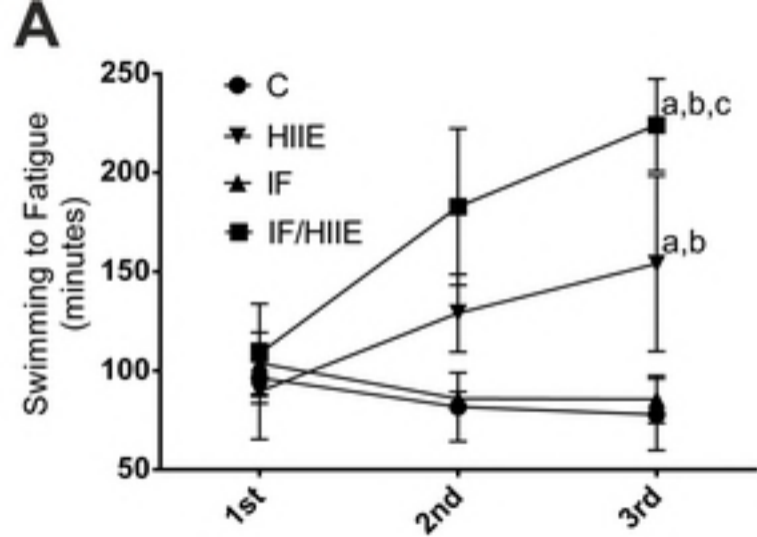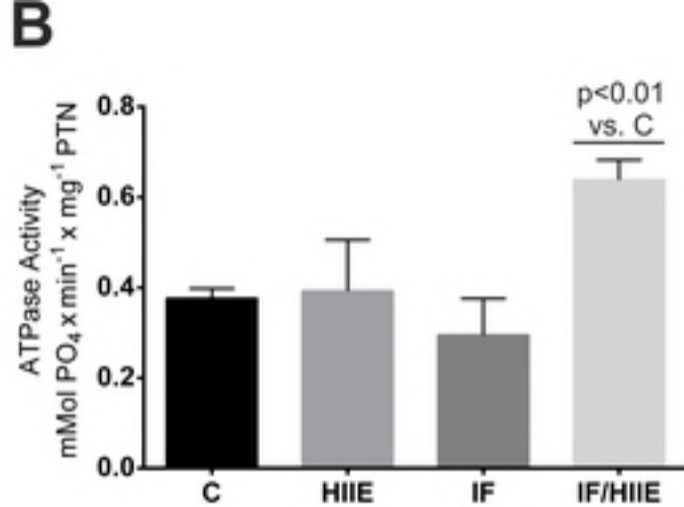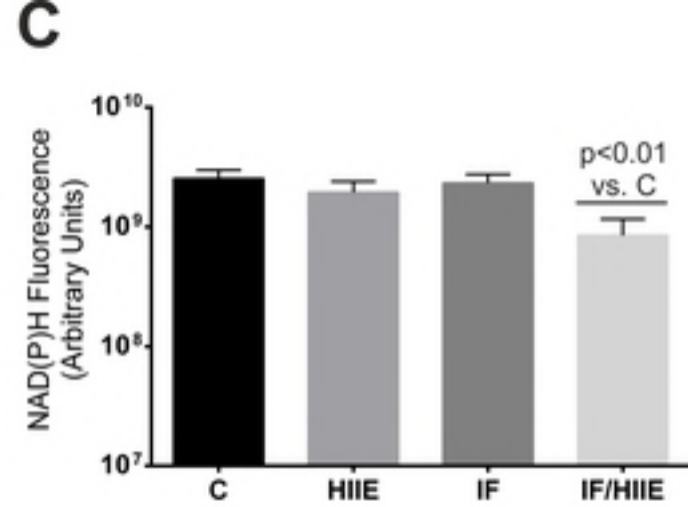

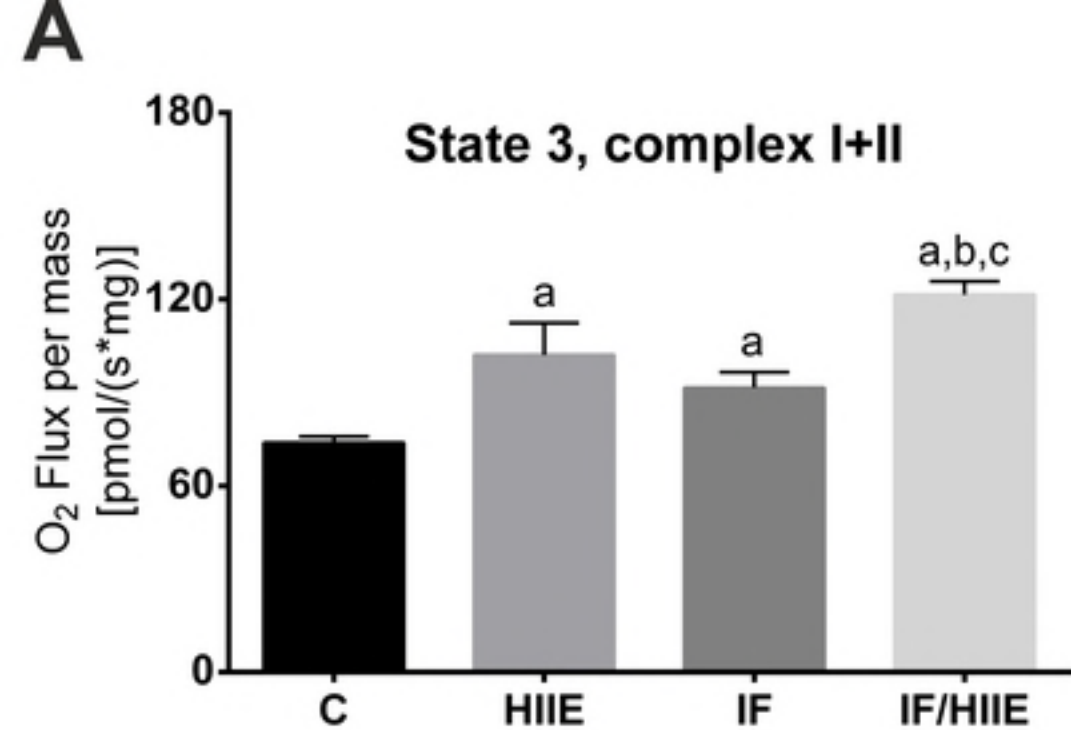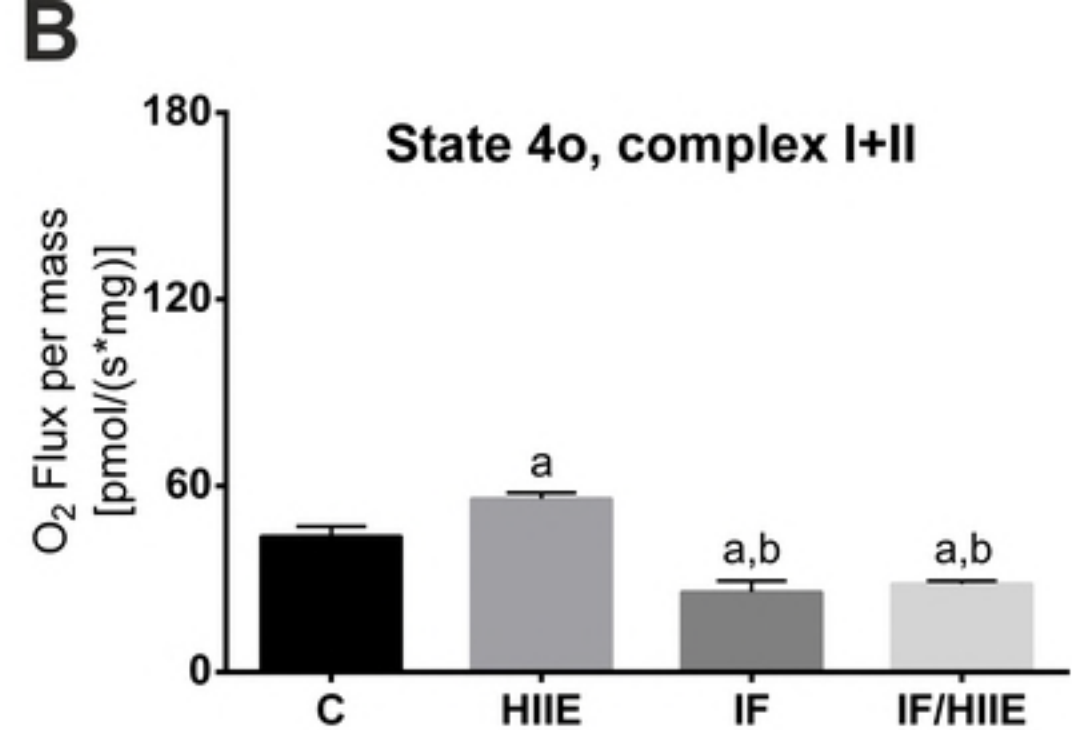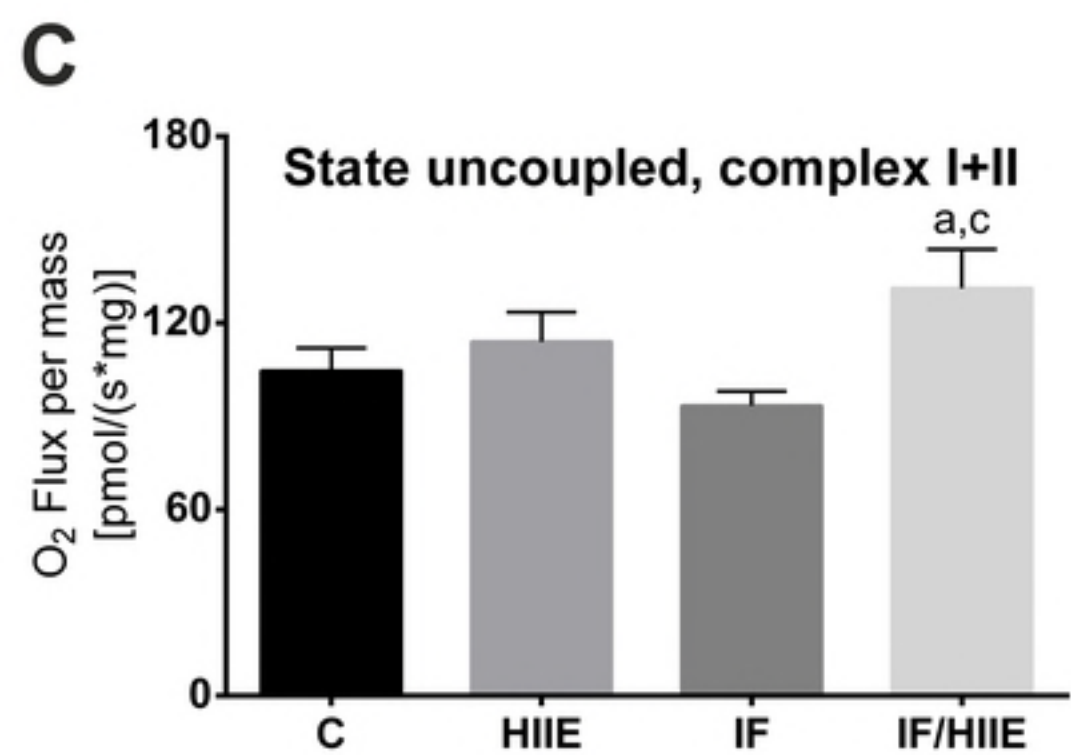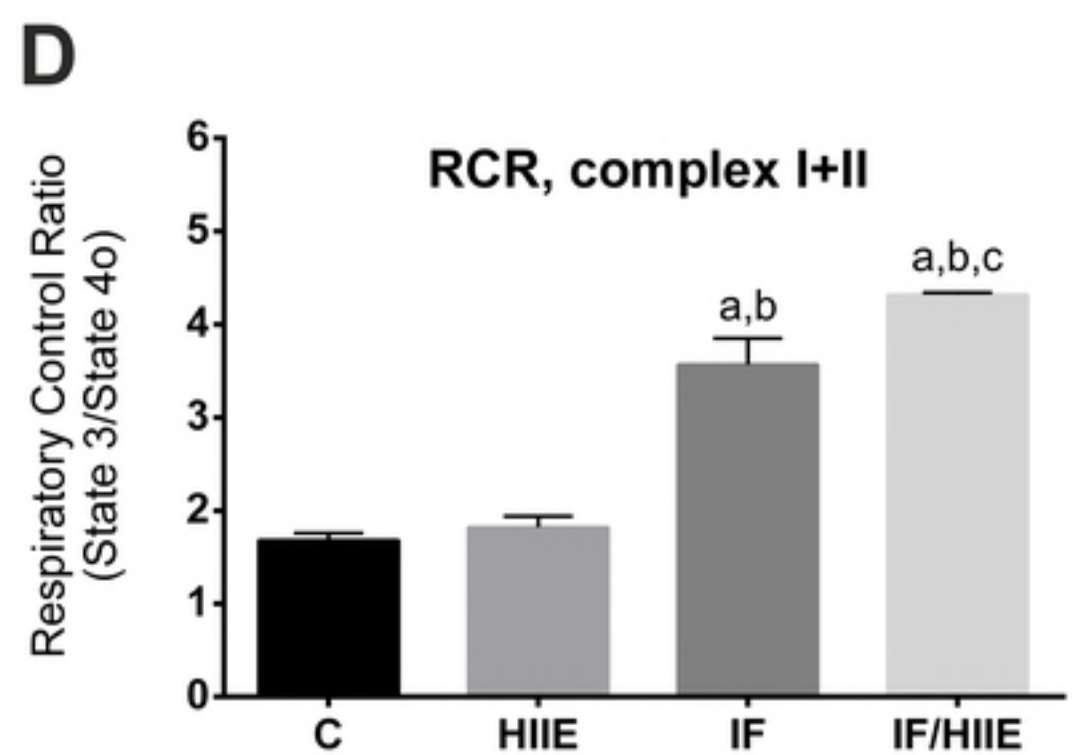



**A**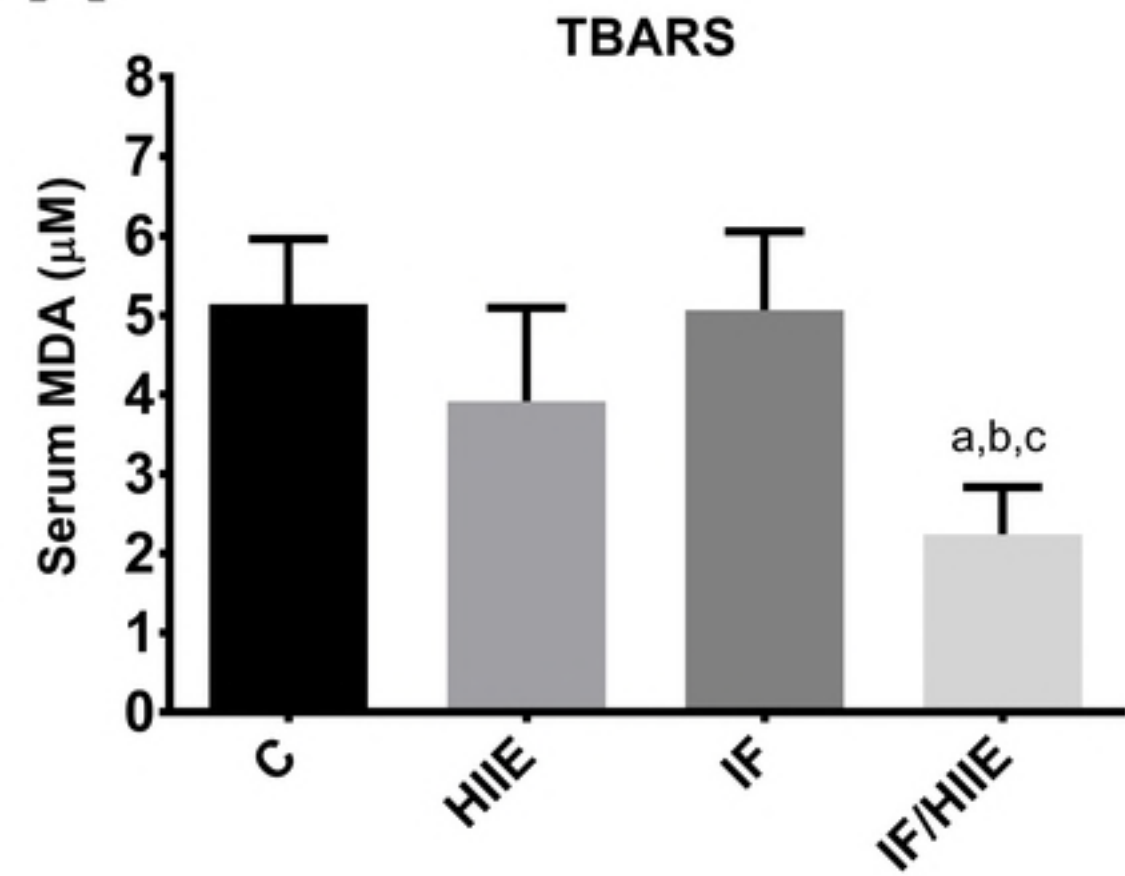**B**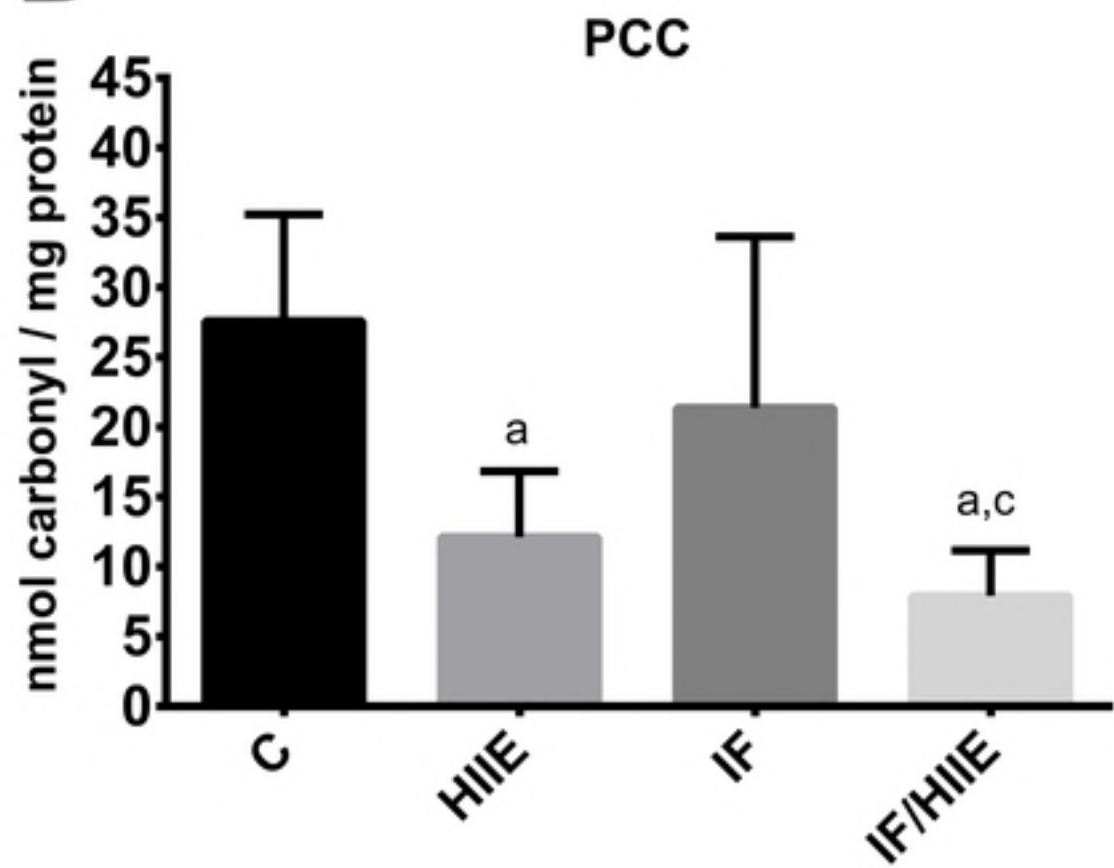

Source: https://www.biorxiv.org/content/10.1101/389668.full.pdf
